# Supplementary material for: Spatial variability of POPs in European background air
Source: Copernicus journal article supplement (doi:10.5194/acp-11-1549-2011), 2011-02-17

## SUPPORTING INFORMATION

for

Anne Karine Halse, Martin Schlabach, Sabine Eckhardt, Andy Sweetman, Kevin C. Jones and  
Knut Breivik

### Spatial variability of POPs in European background air

#### Contents

|                |                                                                                                                                                                                          |
|----------------|------------------------------------------------------------------------------------------------------------------------------------------------------------------------------------------|
| <b>Tables</b>  | <b>2</b>                                                                                                                                                                                 |
| Table S1       | Site description and details. 2                                                                                                                                                          |
| Table S2       | Range in recoveries for the internal standard for exposed samples, field blanks, method blanks as well as PRCs for field and method blanks, respectively (in %). 5                       |
| Table S3       | Instrumental parameters for analysis of the compound groups 7                                                                                                                            |
| Table S4       | Relative deviations from the average value of two parallel PAS. 8                                                                                                                        |
| Table S5       | Relative deviation between PAS and AAS at EMEP sites. 9                                                                                                                                  |
| Table S6       | Concentrations (pg/m <sup>3</sup> ) of PCB-28 derived from AAS, PAS and the FLEXPART model for selected sites. 10                                                                        |
| <b>Text</b>    |                                                                                                                                                                                          |
| S 1.1          | Deployment and sample preparation 11                                                                                                                                                     |
| S 1.2          | Clean-up 11                                                                                                                                                                              |
| S 1.3          | Analyses 12                                                                                                                                                                              |
| S 1.4          | Internal standard recoveries 14                                                                                                                                                          |
| S 1.5          | PRC recoveries 14                                                                                                                                                                        |
| S 1.6          | Duplicate passive air samplers at selected sites 15                                                                                                                                      |
| <b>Figures</b> | <b>18</b>                                                                                                                                                                                |
| Figure S1      | EMEP POP measurement network. 18                                                                                                                                                         |
| Figure S2      | Comparison of selected PAS results for two parallels at six EMEP sites. 19                                                                                                               |
| Figure S3      | Spatial pattern of individual PCBs in European background air. 20                                                                                                                        |
| Figure S4      | Spatial pattern of individual HCHs in European background air. 22                                                                                                                        |
| Figure S5      | Spatial pattern of individual DDTs in European background air. 23                                                                                                                        |
| Figure S6      | Spatial pattern of individual PAHs in European background air. 24                                                                                                                        |
| Figure S7      | Spatial pattern of individual chlordanes in European background air. 26                                                                                                                  |
| Figure S8-S22  | Maps of Footprint ES (emission sensitivity) (a) and EC (emission contribution) (b) for PCB-28 over the PAS sampling period (see text) at selected sites. 27                              |
| Figure S23-S24 | Maps of Footprint ES (emission sensitivity) (a) and EC (emission contribution) (b) for PCB-28 for the AAS sampling period (see text) at Birkenes (23) and Kosetice (24) respectively. 35 |

## Tables

Table S1 Site description and details.

| Country       | EMEP sites | Station name     | Latitude | Longitude | M.a.s.l <sup>5)</sup> | Sample start | Sample end | Sampling rate (m <sup>3</sup> day <sup>-1</sup> ) | PRCs <sup>1)</sup> |
|---------------|------------|------------------|----------|-----------|-----------------------|--------------|------------|---------------------------------------------------|--------------------|
| Austria       | X          | Illmitz          | N 47°46  | E 16°46   | 117                   | 27.07.06     | 02.11.06   | 4.93                                              | 5                  |
| Austria       | X          | Vorhegg          | N 46°40  | E 12°58   | 1020                  | 18.07.06     | 23.10.06   | 4.69                                              | 5                  |
| Belgium       | -          | Koksijde         | N 51°07  | E 02°29   | 7                     | 04.07.06     | 03.10.06   | 3.48                                              | 6                  |
| Bulgaria      | -          | Moussala         | N 42°11  | E 23°35   | 2925                  | 06.07.06     | 05.10.06   | 11.07 <sup>3)</sup>                               | 5                  |
| Croatia       | X          | Zavizan          | N 44°49  | E 14°59   | 1594                  | 10.07.06     | 10.10.06   | 17.88 <sup>3)</sup>                               | 6                  |
| Cyprus        | -          | Ayia Marina      | N 33°02  | E 33°03   | 532                   | 29.06.06     | 02.10.06   | 5.30                                              | 6                  |
| Czech Rep     | X          | Košetice         | N 49°35  | E 15°05   | 534                   | 12.07.06     | 12.10.06   | 3.59/3.97 <sup>4)</sup>                           | 5/5 <sup>4)</sup>  |
| Czech Rep     | X          | Svratouch        | N 49°44  | E 16°02   | 737                   | 13.07.06     | 13.10.06   | 3.72                                              | 5                  |
| Denmark       | X          | Tange            | N 56°21  | E 09°36   | 13                    | 07.07.06     | 06.10.06   | 3.03                                              | 5                  |
| Denmark       | X          | Keldsnor         | N 54°44  | E 10°44   | 10                    | 11.07.06     | 19.10.06   | 3.12                                              | 6                  |
| Denmark       | X          | Anholt           | N 56°43  | E 11°31   | 40                    | 06.07.06     | 06.10.06   | 4.52                                              | 6                  |
| Denmark       | X          | Lille Valby      | N 55°41  | E 12°08   | 10                    | 13.07.06     | 13.10.06   | 4.32                                              | 6                  |
| Estonia       | X          | Laheema          | N 59°30  | E 25°54   | 32                    | 06.07.06     | 10.10.06   | 3.83                                              | 6                  |
| Färoe Islands | -          | Norðuri á Fossum | N 62°11  | W 07°12   | ~300                  | 01.07.06     | 02.10.06   | 4.61                                              | 3                  |
| Finland       | X          | Pallas           | N 67°58  | E 24°07   | 566                   | 19.07.06     | 19.10.06   | 2.80/4.45 <sup>4)</sup>                           | 2/4 <sup>4)</sup>  |
| Finland       | X          | Ähtari           | N 62°33  | E 24°13   | 162                   | 01.07.06     | 02.10.06   | 3.78                                              | 6                  |
| Finland       | X          | Utö              | N 59°47  | E 21°23   | 7                     | 30.06.06     | 02.10.06   | 8.10                                              | 6                  |
| Finland       | X          | Virolahti        | N 60°31  | E 27°41   | 4                     | 01.07.06     | 01.10.06   | 4.51                                              | 6                  |
| Finland       | X          | Oulanka          | N 66°19  | E 29°24   | 310                   | 30.06.06     | 30.09.06   | 4.18                                              | 5                  |
| Finland       | X          | Hailuoto         | N 65°00  | E 24°41   | 4                     | 04.07.06     | 03.10.06   | 4.19                                              | 6                  |
| France        | X          | Donon            | N 48°30  | E 07°08   | 775                   | 05.07.06     | 05.10.06   | 3.95                                              | 6                  |
| France        | X          | Peyrusse Vieille | N 47°37  | E 00°11   | 236                   | 11.07.06     | 10.10.06   | 4.23                                              | 6                  |
| France        | X          | La Tardiere      | N 46°39  | W 00°45   | 133                   | 04.07.06     | 03.10.06   | 4.03                                              | 6                  |
| France        | X          | Le Casset        | N 45°00  | E 06°28   | 1750                  | 04.07.06     | 03.10.06   | 3.96                                              | 5                  |
| France        | X          | Porspoder        | N 48°31  | E 04°45   | 50                    | 10.07.06     | 16.10.06   | 7.31                                              | 6                  |
| Germany       | X          | Westerland       | N 54°56  | E 08°19   | 12                    | 07.07.06     | 09.10.06   | 5.01                                              | 6                  |
| Germany       | X          | Schmücke         | N 50°39  | E 10°46   | 937                   | 10.07.06     | 10.10.06   | 2.99                                              | 4                  |

|             |   |                    |         |         |      |          |          |                         |                   |
|-------------|---|--------------------|---------|---------|------|----------|----------|-------------------------|-------------------|
| Germany     | X | Zingst             | N54°26  | E 12°44 | 1    | 10.07.06 | 09.10.06 | 4.01                    | 6                 |
| Germany     | X | Schauinsland       | N 47°54 | E 07°54 | 1205 | 10.07.06 | 10.10.06 | 3.75                    | 5                 |
| Germany     | X | Neuglobsow         | N 53°09 | E 13°02 | 62   | 24.07.06 | 24.10.06 | 3.29                    | 6                 |
| Greece      | X | Aliartos           | N 38°22 | E 23°05 | 110  | 11.07.06 | 12.10.06 | 3.42                    | 6                 |
| Greenland   | - | Nuuk               | N 64°11 | W 51°44 | ~5   | 04.07.06 | 08.10.06 | 3.50 <sup>2)</sup>      | -                 |
| Greenland   | - | Summit             | N 72°52 | W 38°46 | 3250 | 28.07.06 | 20.10.06 | 3.50 <sup>2)</sup>      | -                 |
| Hungary     | X | K-puszt            | N 46°58 | E 19°35 | 125  | 18.07.06 | 19.10.06 | 3.45                    | 5                 |
| Iceland     | X | Stórhöfði          | N 63°27 | W 20°15 | 118  | 11.07.06 | 08.10.06 | 11.53/10.90             | 6/6               |
| Ireland     | X | Mace Head          | N 53°20 | W 09°54 | 25   | 10.07.06 | 18.10.06 | 7.90                    | 6                 |
| Ireland     | - | Malin Head         | N 55°22 | W 07°20 | 22   | 06.07.06 | 08.10.06 | 5.86                    | 6                 |
| Ireland     | - | Carnsore Point     | N 52°11 | W 06°22 | 9    | 19.07.06 | 11.10.06 | 9.51                    | 6                 |
| Italy       | X | Ispra              | N 45°48 | E 08°38 | 209  | 07.09.06 | 04.12.06 | 4.13                    | 2                 |
| Italy       | X | Montelibretti      | N 42°06 | E 12°38 | 48   | 03.07.06 | 20.09.06 | 3.63                    | 6                 |
| Italy       | - | Longobucco         | N 39°39 | E 16°61 | 1379 | 28.07.06 | 07.11.06 | 3.02 <sup>3)</sup>      | 4                 |
| Italy       | - | San Lucido         | N 39°19 | E 16°02 | 49   | 27.07.06 | 13.11.06 | 2.88                    | 6                 |
| Kazakhstan  | - | Borovoye           | N 44°08 | E 75°51 | ~300 | 15.08.06 | 17.11.06 | 2.07                    | 2                 |
| Latvia      | X | Rucava             | N 56°13 | E 21°13 | 18   | 17.07.06 | 17.10.06 | 3.55                    | 5                 |
| Latvia      | X | Zoseni             | N 57°08 | E 25°55 | 183  | 17.07.06 | 17.10.06 | 3.49                    | 5                 |
| Lithuania   | X | Preila             | N 55°21 | E 21°04 | 5    | 22.07.06 | 01.10.06 | 4.91                    | 6                 |
| Lithuania   | - | Rugstelis          | N 55°26 | E 26°04 | 120  | 15.07.06 | 30.09.06 | 2.56                    | 2                 |
| Malta       | X | Giordan lighthouse | N 36°06 | E 14°12 | 160  | 02.08.06 | 07.11.06 | 6.90                    | 6                 |
| Moldova     | X | Leovo              | N 46°30 | E 28°16 | 156  | 10.07.06 | 10.10.06 | 4.60                    | 4                 |
| Netherlands | X | Kollumerwaard      | N 53°20 | E 06°17 | 0    | 26.07.06 | 22.11.06 | 5.77                    | 6                 |
| Netherlands | X | Vredepeel          | N 51°32 | E 05°51 | 28   | 25.07.06 | 21.11.06 | 5.69                    | 5                 |
| Norway      | X | Birkenes           | N 58°23 | E 08°15 | 190  | 02.07.06 | 01.10.06 | 3.03/3.58 <sup>4)</sup> | 5/6 <sup>4)</sup> |
| Norway      | X | Tustervatn         | N 65°50 | E 13°55 | 439  | 28.06.06 | 09.10.06 | 4.03                    | 4                 |
| Norway      | X | Kårvatn            | N 62°47 | E 08°53 | 210  | 29.06.06 | 10.10.06 | 3.88                    | 6                 |
| Norway      | X | Spitsbergen        | N 78°54 | E 11°53 | 474  | 14.07.06 | 26.09.06 | 3.50/3.50 <sup>2)</sup> | -/ <sup>4)</sup>  |
| Norway      | X | Hurdal             | N 60°22 | E 11°04 | 300  | 01.07.06 | 02.10.06 | 3.59                    | 5                 |
| Norway      | X | Karasjok           | N 69°28 | E 25°13 | 333  | 26.06.06 | 29.09.06 | 4.34                    | 6                 |
| Poland      | X | Diabla Gora        | N 54°09 | E 22°04 | 157  | 06.07.06 | 06.10.06 | 4.92                    | 5                 |
| Poland      | X | Jarczew            | N 51°19 | E 21°59 | 180  | 01.07.06 | 02.10.06 | 4.05                    | 6                 |

|                |   |                  |         |         |      |          |          |                         |                   |
|----------------|---|------------------|---------|---------|------|----------|----------|-------------------------|-------------------|
| Poland         | X | Sniezka          | N 50°44 | E 15°44 | 1604 | 10.07.06 | 10.10.06 | 3.50 <sup>2)</sup>      | -                 |
| Poland         | X | Leba             | N 54°45 | E 17°32 | 2    | 13.07.06 | 13.10.06 | 4.40                    | 6                 |
| Portugal       | X | Bragança         | N 41°49 | W 06°46 | 691  | 19.07.06 | 19.10.06 | 4.44                    | 6                 |
| Portugal       | X | Monte Velho      | N 38°05 | W 08°48 | 43   | 19.07.06 | 19.10.06 | 3.29                    | 6                 |
| Slovakia       | X | Chopok           | N 48°56 | E 19°35 | 2008 | 02.07.06 | 03.10.06 | 19.18 <sup>3)</sup>     | 5                 |
| Slovakia       | X | Starina          | N 49°03 | E 22°16 | 345  | 04.07.06 | 04.10.06 | 4.23                    | 5                 |
| Slovenia       | X | Iskrba           | N 45°34 | E 14°52 | 520  | 07.07.06 | 06.10.06 | 3.53                    | 5                 |
| Spain          | X | Víznar           | N 37°14 | W 03°32 | 1265 | 14.07.06 | 14.10.06 | 4.34                    | 6                 |
| Spain          | X | Niembro          | N 43°27 | W 04°51 | 134  | 12.07.06 | 12.10.06 | 5.63                    | 6                 |
| Spain          | X | Els Torms        | N 41°24 | E 00°43 | 470  | 15.07.06 | 15.10.06 | 3.55                    | 6                 |
| Spain          | X | Risco Llamio     | N 39°31 | W 04°21 | 1241 | 13.07.06 | 13.10.06 | 3.63                    | 6                 |
| Sweden         | X | Råö              | N 57°24 | E 11°55 | 5    | 04.07.06 | 02.10.06 | 8.33/6.24 <sup>4)</sup> | 6/6 <sup>4)</sup> |
| Sweden         | X | Aspvreten        | N 58°48 | E 17°23 | 20   | 06.07.06 | 06.10.06 | 1.66                    | 2                 |
| Sweden         | X | Vavihill         | N 56°01 | E 13°09 | 172  | 11.07.06 | 08.10.06 | 3.47                    | 5                 |
| Sweden         | X | Bredkälen        | N 63°51 | E 15°20 | 404  | 06.06.06 | 06.09.06 | 2.56                    | 3                 |
| Sweden         | X | Hoburg           | N 56°55 | E 18°09 | 58   | 30.06.06 | 03.10.06 | 6.71                    | 6                 |
| Sweden         | - | Abisko           | N 68°21 | E 18°49 | ~385 | 06.07.06 | 11.10.06 | 6.11                    | 6                 |
| Sweden         | X | Vindeln          | N 64°15 | E 19°46 | 225  | 28.06.06 | 28.09.06 | 3.41                    | 6                 |
| Switzerland    | X | Jungfrauoch      | N 46°33 | E 07°59 | 3573 | 06.07.06 | 13.10.06 | 8.0 <sup>3)</sup>       | 5                 |
| Switzerland    | X | Payerne          | N 46°48 | E 06°57 | 510  | 05.07.06 | 11.10.06 | 3.42                    | 5                 |
| Ukraine        | - | Zmeiny Island    | N 45°15 | E 30°12 | n.a. | 17.07.06 | 08.11.06 | 7.58                    | 5                 |
| United Kingdom | X | Harwell          | N 51°34 | W 01°19 | 137  | 05.07.06 | 09.10.06 | 3.92                    | 6                 |
| United Kingdom | - | Auchencorth Moss | N 55°80 | W 03°20 | 255  | 03.07.06 | 13.10.06 | 3.75                    | 4                 |
| United Kingdom | X | Lough Navar      | N 54°26 | W 07°54 | 126  | 03.07.06 | 11.10.06 | 3.97                    | 6                 |
| United Kingdom | X | Yarner Wood      | N 50°36 | W 03°43 | 119  | 30.06.06 | 02.10.06 | 3.90                    | 6                 |
| United Kingdom | X | High Muffles     | N 54°20 | W 00°48 | 267  | 05.07.06 | 04.10.06 | 2.89                    | 4                 |
| United Kingdom | X | Strath Vaich Dam | N 57°44 | W 04°46 | 270  | 30.06.06 | 02.10.06 | 4.25                    | 6                 |

1) Number of PRCs with more than 40 % loss during deployment. 2) No significant loss of PRCs, default value used. 3) Adjusted temperature as detailed in section 2. 4) Results for two PAS parallels: Sample A / Sample B. 5) Meters above sea level.

Table S2 Range in recoveries for the internal standard for exposed samples, field blanks, method blanks as well as PRCs for field and method blanks, respectively (in %).

| Internal standards and PRCs         | Range                |                      |              |
|-------------------------------------|----------------------|----------------------|--------------|
|                                     | Exposed samples      | Field blank          | Method blank |
| Metylnaphtalene-d <sub>10</sub>     | 24-45                | 29-40                | 31-40        |
| Acenaphtene- d <sub>10</sub>        | 34-77                | 33-44                | 33-61        |
| Antracene- d <sub>10</sub>          | 40-78                | 52-64                | 34-69        |
| Pyrene- d <sub>10</sub>             | 49-91                | 61-71                | 51-83        |
| Benz(a)anthracene- d <sub>12</sub>  | 53-137               | 75-93                | 27-111       |
| Benz(e)pyrene- d <sub>12</sub>      | 54-126               | 76-85                | 66-96        |
| Benzo(ghi)perylene- d <sub>12</sub> | 50-114               | 64-81                | 41-96        |
| <sup>13</sup> C-PeCB                | 21-49                | 22-31                | 23-37        |
| <sup>13</sup> C-PCB (28)            | 48-89                | 55-72                | 62-79        |
| <sup>13</sup> C -PCB (52)           | 48-89                | 58-78                | 65-82        |
| <sup>13</sup> C -PCB (101)          | 59-104               | 74-90                | 80-97        |
| <sup>13</sup> C -PCB (105)          | 69-127               | 90-112               | 98-115       |
| <sup>13</sup> C -PCB (114)          | 66-124               | 85-105               | 90-110       |
| <sup>13</sup> C -PCB (118)          | 68-119               | 86-108               | 92-114       |
| <sup>13</sup> C -PCB (123)          | 64-127               | 88-108               | 92-112       |
| <sup>13</sup> C -PCB (153)          | 70-119               | 86-107               | 87-114       |
| <sup>13</sup> C -PCB (138)          | 74-125               | 93-115               | 100-116      |
| <sup>13</sup> C -PCB (167)          | 72-136               | 96-122               | 104-127      |
| <sup>13</sup> C -PCB (156)          | 73-137               | 103-124              | 107-129      |
| <sup>13</sup> C -PCB (157)          | 74-140               | 103-123              | 108-130      |
| <sup>13</sup> C -PCB (180)          | 76-129               | 99-120               | 100-125      |
| <sup>13</sup> C -PCB (189)          | 81-132               | 108-124              | 108-128      |
| <sup>13</sup> C -PCB (209)          | 76-129               | 102-119              | 107-127      |
| <sup>13</sup> C -HCB                | 30-63                | 27-37                | 34-47        |
| <sup>13</sup> C - <i>p,p'</i> -DDE  | 55-139               | 78-119               | 68-115       |
| <sup>13</sup> C - <i>p,p'</i> -DDT  | 32-218 <sup>1)</sup> | 85-198 <sup>1)</sup> | 77-119       |

|                                  |        |        |                      |
|----------------------------------|--------|--------|----------------------|
| <sup>13</sup> C -α-HCH           | 32-118 | 31-48  | 35-67                |
| <sup>13</sup> C -β-HCH           | 19-117 | 45-76  | 61-88                |
| <sup>13</sup> C -γ-HCH           | 44-136 | 51-75  | 57-88                |
| <sup>13</sup> C -trans-Chlordane | 42-122 | 70-94  | 71-122 <sup>2)</sup> |
| <sup>13</sup> C -trans-Nonachlor | 29-121 | 33-44  | 43-121 <sup>2)</sup> |
| <sup>13</sup> C Mirex            | 11-132 | 74-116 | 73-160 <sup>2)</sup> |
| <b>PRCs</b>                      |        |        |                      |
| d6-γ-HCH                         | -      | 86-103 | 72-106               |
| PCB-12                           | -      | 73-94  | 76-107               |
| PCB-14                           | -      | 61-80  | 69-100               |
| PCB-23                           | -      | 72-85  | 74-103               |
| PCB-30                           | -      | 57-74  | 66-90                |
| PCB-32                           | -      | 78-91  | 81-105               |
| PCB-107                          | -      | 87-100 | 75-110               |
| PCB-198                          | -      | 80-93  | 75-116               |

- 1) Two sites showed higher recovery. Highest % recovery for the deployed samples was for one of the parallels at the Spitsbergen site, while the highest % recovery for the field blanks occurred for the Košetice site.
- 2) The higher recovery originates from one method blank

Table S3 Instrumental parameters for analysis of the compound groups.

| Compound groups | Type of instrument                                                     | Type of column                                    | Column size                                              | Carrier gas | Operational parameters                                                                                                                  |                         |
|-----------------|------------------------------------------------------------------------|---------------------------------------------------|----------------------------------------------------------|-------------|-----------------------------------------------------------------------------------------------------------------------------------------|-------------------------|
|                 |                                                                        |                                                   |                                                          |             | Temp.interv.                                                                                                                            | Target ion              |
| PCBs & HCB      | GC/HRMS in EI mode<br>(Agilent6890 GC coupled to Waters AutoSpec)      | Fused silica capillary column from SGE            | HT-8, 50 m length, 0.22 mm I.D, 0.15 mm film thickness   | Helium      | Start (°C): 90 (2 min.)<br>Intervall 1: 25°C/min to 170°C<br>Intervall 2: 308°C by 3°C/min<br>Injector temp. (°C): 280                  | [M] <sup>+</sup>        |
| HCHs & DDTs     | GC/HRMS in EI mode<br>(Agilent6890 GC coupled to Micromass AutoSpec).  | Fused silica capillary column from J&W Scientific | HP-1, 25 m length, 0.2 mm I.D, 0.33 mm film thickness    | Helium      | Start (°C): 95 (1.5 min.)<br>Intervall: 280°C by 20°C/min (5 min.)<br>Injector temp. (°C): 220                                          | [M] <sup>+</sup>        |
| PAHs            | GC/LRMS in EI mode<br>(Agilent6890 GC coupled to Agilent5973 MSD)      | Fused silica capillary column from Zebron         | ZB-5, 30 m length, 0.25 mm I.D, 0.10 mm film thickness   | Helium      | Start (°C):50<br>Intervall 1: 100°C/min by 20°C/min.<br>Intervall 2: 320°C by 5°C/min<br>Injector temp. (°C): 300                       | [M] <sup>+</sup>        |
| Chlordanes      | GC/LRMS in ENCI mode,<br>(Agilent6890 GC coupled to a Agilent5973 MSD) | Fused silica capillary column from J&W Scientific | Ultra 2, 25 m length, 0.2 mm I.D, 0.11 mm film thickness | Helium      | Start (°C): 90 (2 min.)<br>Intervall 1: 170°C by 20°C/min (3 min)<br>Intervall 2: 235°C by 5°C/min (2 min.)<br>Injector temp. (°C): 260 | [M-Cl]-<br>and [M-2Cl]- |

Table S4 Relative deviations from the average value of two parallel PAS.

| Compounds/compound- groups | Košetice CZ 0003R | Pallas FI 0096G         | Stórhöfði IS 0019R      | Birkenes NO 0001R        | Spitsbergen NO 0042G    | Råö SE 0014R           |
|----------------------------|-------------------|-------------------------|-------------------------|--------------------------|-------------------------|------------------------|
| <b>PCB-28</b>              | ±1                | ±23                     | ±8                      | ±8                       | ±46                     | ±27                    |
| <b>PCB-52</b>              | ±1                | ±26                     | ±7                      | ±9                       | ±19                     | ±20                    |
| <b>PCB-101</b>             | ±6                | ±27                     | ±5                      | ±8                       | ±10                     | ±6                     |
| <b>PCB-118</b>             | ±7                | ±24                     | ±1                      | ±9                       | n.d.                    | ±3                     |
| <b>PCB-138</b>             | ±7                | ±32                     | ±1                      | ±8                       | n.d.                    | ±0,3                   |
| <b>PCB-153</b>             | ±8                | n.d.                    | ±3                      | ±9                       | n.d.                    | ±1                     |
| <b>PCB-180</b>             | ±12               | ±38                     | ±12                     | ±8                       | n.d.                    | ±4                     |
| <b>Σ<sub>n</sub>PCBs</b>   | ±4                | ±26 (n=6) <sup>1)</sup> | ±4                      | ±8                       | ±30 (n=3) <sup>1)</sup> | ±8                     |
| <b>α-HCH</b>               | ±7                | ±13                     | ±1                      | ±13                      | ±6                      | ±12                    |
| <b>γ-HCH</b>               | ±7                | ±15                     | ±6                      | ±13                      | ±2                      | ±18                    |
| <i>p,p'</i> -DDE           | ±9                | n.d.                    | n.d.                    | n.d.                     | n.d.                    | ±35                    |
| <i>p,p'</i> -DDD           | ±9                | n.d.                    | n.d.                    | n.d.                     | n.d.                    | ±23                    |
| <i>o,p'</i> -DDT           | ±6                | n.d.                    | n.d.                    | ±18                      | n.d.                    | ±8                     |
| <i>p,p'</i> -DDT           | ±5                | n.d.                    | n.d.                    | ±13                      | n.d.                    | ±24                    |
| <b>Σ<sub>n</sub>DDTs</b>   | ±8                | n.d.                    | n.d.                    | ±15 (n= 2) <sup>1)</sup> | n.d.                    | ±26                    |
| <b>Fluorene</b>            | ±9                | ±20                     | n.d.                    | ±10                      | n.d.                    | ±11                    |
| <b>Phenanthrene</b>        | ±2                | ±26                     | n.d.                    | ±13                      | n.d.                    | ±9                     |
| <b>Anthracene</b>          | ±0.02             | n.d.                    | n.d.                    | n.d.                     | n.d.                    | n.d.                   |
| <b>Fluoranthene</b>        | ±8                | ±31                     | n.d.                    | ±14                      | n.d.                    | ±8                     |
| <b>Pyrene</b>              | ±8                | ±31                     | ±15                     | ±20                      | n.d.                    | ±6                     |
| <b>Benzo[a]pyrene</b>      | ±12               | n.d.                    | n.d.                    | n.d.                     | n.d.                    | n.d.                   |
| <b>Benz[a]anthracene</b>   | ±14               | n.d.                    | n.d.                    | n.d.                     | n.d.                    | n.d.                   |
| <b>Chrysene</b>            | ±11               | ±36                     | n.d.                    | ±8                       | n.d.                    | ±10                    |
| <b>Σ<sub>n</sub>PAH</b>    | ±2                | ±25 (n=5) <sup>1)</sup> | ±15 (n=1) <sup>1)</sup> | ±12 (n=5) <sup>1)</sup>  | n.d.                    | ±9 (n=5) <sup>1)</sup> |
| <b>HCB</b>                 | ±2                | ±19                     | ±1                      | ±4                       | ±22                     | ±8                     |

n.d.: one or both samples below MDL

<sup>1)</sup> Sum PCBs, DDTs and PAHs only include the sum of substances where both samples are above MDL (number in parantheses).



Table S5 Percentage deviation between PAS and AAS at EMEP sites  $[(C_{PAS}-C_{AAS})/C_{AAS}]$ . A positive deviation indicates higher concentrations in the PAS.

| Compound/compound group | Košetice CZ CZ0003R |                 | Birkenes NO 0001R |                                   | Stórhöfði IS 0019R |                  | Spitsbergen NO 0042G |  |
|-------------------------|---------------------|-----------------|-------------------|-----------------------------------|--------------------|------------------|----------------------|--|
|                         |                     | Råö SE 0014R    |                   | Aspvreten SE 0012 <sup>1)</sup> R |                    | Pallas FI 0096G  |                      |  |
| PCB-28                  | 69                  | 49              | -4                | 102                               | -77                | -70              | -54                  |  |
| PCB-52                  | 48                  | 39              | 5                 | 64                                | -48                | -62              | 22                   |  |
| PCB-101                 | 178                 | 40              | 24                | -22                               | -37                | -34              | 111                  |  |
| PCB-118                 | 56                  | 47              | -12               | -30                               | 50                 | -5               | n.d.                 |  |
| PCB-138                 | 257                 | 33              | -13               | 4                                 | 11                 | -26              | n.d.                 |  |
| PCB-153                 | 193                 | 65              | -24               | 34                                | 35                 | n.d.             | n.d.                 |  |
| PCB-180                 | -27                 | 66              | -53               | 64                                | 9                  | 41               | n.d.                 |  |
| $\Sigma_n$ PCB          | <b>86</b>           | <b>47</b>       | <b>-5</b>         | <b>25</b>                         | <b>-51</b>         | <b>-59 (n=6)</b> | <b>-35 (n=3)</b>     |  |
| $\alpha$ -HCH           | 98                  | 19              | -43               | 154                               | 318                | -17              | 23                   |  |
| $\gamma$ -HCH           | 85                  | 24              | -48               | 54                                | -8                 | -30              | 22                   |  |
| <i>p,p'</i> -DDE        | 264                 | 63              | n.a.              | -34                               | n.d.               | n.d.             | n.d.                 |  |
| <i>p,p'</i> -DDD        | -39                 | -24             | n.a.              | n.a.                              | n.d.               | n.d.             | n.d.                 |  |
| <i>p,p'</i> -DDT        | 577                 | 10              | n.a.              | n.a.                              | n.d.               | n.d.             | n.d.                 |  |
| $\Sigma$ nDDTs          | <b>282 (n=3)</b>    | <b>40 (n=3)</b> | <b>n.a.</b>       | <b>-34 (n=1)</b>                  | <b>n.d.</b>        | <b>n.d.</b>      | <b>n.d.</b>          |  |
| Phenanthrene            | 211                 | 52              | n.a.              | 109                               | n.a.               | 51               | n.d.                 |  |
| Anthracene              | 137                 | n.d.            | n.a.              | 512                               | n.a.               | n.d.             | n.d.                 |  |
| Fluoranthene            | 270                 | 46              | n.a.              | 13                                | n.a.               | 71               | n.d.                 |  |
| Pyrene                  | 240                 | 5               | n.a.              | -16                               | n.a.               | 32               | n.d.                 |  |
| Benzo[a]pyrene          | -49                 | n.d.            | n.a.              | n.d.                              | n.a.               | n.d.             | n.d.                 |  |
| Benz[a]anthracene       | 73                  | n.d.            | n.a.              | -47                               | n.a.               | n.d.             | n.d.                 |  |
| $\Sigma_n$ PAH          | <b>216 (n=6)</b>    | <b>45 (n=3)</b> | <b>n.a.</b>       | <b>76 (n=5)</b>                   | <b>n.a.</b>        | <b>52 (n=3)</b>  | <b>n.d.</b>          |  |
| HCB                     | 36                  | n.a.            | -31               | n.a.                              | 1540               | n.a.             | 34                   |  |
| Sampling duration       | 1 day               | 2 weeks         | 1 day             | 1 week                            | 2 weeks            | 1 week           | 2 days               |  |
| Sampling frequency      | 1x week             | 2x month        | 1x week           | 1x month                          | 2x month           | 1x month         | 1x week              |  |
| Sampling coverage (%)   | ~14                 | ~100            | ~14               | ~25                               | ~100               | ~25              | ~29                  |  |

1) Only one PAS sample available for this site.

n.d. : Values below MDL in PAS. n.a. : no available data for the AAS

Table S6 Concentrations (pg/m<sup>3</sup>) of PCB-28 derived from AAS, PAS and the FLEXPART model for selected sites.

| Country        | Sites              | AAS  | PAS                 | Model | % deviation<br>(Model/PAS) |
|----------------|--------------------|------|---------------------|-------|----------------------------|
| Czech Republic | Košetice           | 6.51 | 10.98 <sup>1)</sup> | 13.57 | 24                         |
| Finland        | Pallas             | 4.12 | 1.25 <sup>1)</sup>  | 2.74  | 119                        |
| Iceland        | Stórhöfði          | 4.22 | 0.96 <sup>1)</sup>  | 0.79  | -18                        |
| Norway         | Birkenes           | 2.13 | 2.04 <sup>1)</sup>  | 4.69  | 130                        |
| Norway         | Spitsbergen        | 3.19 | 1.48 <sup>1)</sup>  | 0.26  | -82                        |
| Sweden         | Råö                | 3.15 | 4.68 <sup>1)</sup>  | 6.69  | 43                         |
| Sweden         | Aspvreten          | 1.66 | 3.34                | 5.81  | 74                         |
| Ireland        | Mace Head          | n.d. | 1.15                | 2.28  | 98                         |
| Ireland        | Malin Head         | n.d. | 1.22                | 2.02  | 66                         |
| Italy          | Longobucco         | n.d. | 1.58                | 10.36 | 556                        |
| Kazakhstan     | Borovoye           | n.d. | 8.79                | 4.43  | -50                        |
| Malta          | Giordan lighthouse | n.d. | 5.35                | 6.33  | 18                         |
| Poland         | Jarczew            | n.d. | 6.85                | 9.81  | 43                         |
| Poland         | Leba               | n.d. | 4.96                | 8.59  | 73                         |
| Spain          | Víznar             | n.d. | 2.28                | 6.24  | 174                        |
| Spain          | Els Torms          | n.d. | 2.67                | 7.11  | 166                        |
| United Kingdom | Strath Vaich Dam   | n.d. | 0.96                | 2.42  | 152                        |

<sup>1)</sup> Average of two PAS

## Text

### *S 1.1 Deployment and sample preparation*

In the following, the solvents and sulfuric acid used for sample preparation and clean-up were of pesticide grade from Merck (Darmstadt, Germany), except diethyl ether which was purchased from Rathburn (Walkerburn, Scotland). Anhydrous sodium sulfate and silica gel were purchased from Merck (Darmstadt, Germany).

Prior to deployment, the PUF disks (14 cm in diameter, 1.35 cm thick, surface area 0.0364 m<sup>2</sup>, density 2.47 10<sup>-2</sup> g/m<sup>3</sup>; Sunde Søm & Skumplast A/S, Gan, Norway) were pre-cleaned using Soxhlet extraction with toluene for 24 hours, with acetone for 8 hours and finally with toluene for new 8 hours. The PUF disks were then dried in desiccators at 40°C under vacuum until they were completely dry. The PUF disks were spiked with the following PRC mixture (PCBs 12, 14, 23, 30, 32, 107, 198 and d6  $\gamma$ -HCH) by adding 25  $\mu$ L PRC mixture, with the respective concentrations; 189.4, 188.4, 188.4, 188.3, 193.6, 189.0, 187.9, 186.7 pg/ $\mu$ L, in 10 mL of pentane in a small vial. This solution was applied evenly on both sides of the PUF disk using a Pasteur pipette in a clean laboratory environment (class 100000 part/m<sup>3</sup>/ft). The PUF disks were placed on 3 short metal tubes to minimize the contact area during spiking. The spiked PUFs were next wrapped in double layers of alumina foil, double zip-lock bags and stored in a freezer until shipment. Pre-cleaning of the sampling chambers prior to shipment was carried out by soaking all the parts in soap solution over night, followed by rinsing in tap water and acetone. Each sampling kit was then packed in sealed plastic bags to avoid contamination during shipment.

### *S 1.2 Clean-up*

In order to reduce sample contamination all laboratory equipment was rinsed with *n*-hexane immediately before use. The exposed PUF disks and field blanks were stored in a freezer until extraction and clean-up. Prior to extraction, the PUF disk were unwrapped in a clean-room laboratory environment, spiked with internal standards (see S 1.3), and placed in a Soxhlet

extractor. The disks were Soxhlet extracted for 8-10 hours in approximately 250 mL of *n*-hexane. Extracts were concentrated to about 0.5 mL on a TurboVap 500 System (Zymark, Hopkinton, MA, USA), and transferred to a graduated cylinder. Further sample treatment was done separately and the extracts were therefore divided into two identical aliquots.

The acid resistant part (PCBs, HCHs, DDTs, HCB, pesticides (trans-chlordane, cis-chlordane, trans-nonachlor, cis-nonachlor) of the extract was transferred to a centrifuge tube, adjusted to 2 mL, and treated with 2 mL concentrated sulfuric acid for mixing by vigorous whirling on a whirl mixer. During this treatment the extract turns color to dark yellow. The treatment was repeated until no more color change was visible (2-3 times). The extract was then transferred to an evaporation unit and reduced to 0.5 mL for further clean-up by fractionation with a silica column (15 mm in diameter and 200 mm in length). The column consists of 4 g of activated silica (Silica gel 60 Merck nr. 7734 0.063 – 0.200 mm pretreated 8 h at 550°C) topped with 1 cm anhydrous sodium sulfate (pretreated 12 h at 600°C). The column was prewashed with 30 mL *n*-hexane. The samples were eluted with 30 mL *n*-hexane/10 % diethyl ether. Extracts were reduced to 0.5 mL by evaporation and solvent exchanged into *iso*-octane and transferred to a small vial with a screw-cap.

The PAH part of the extract was solvent exchanged to cyclohexane and cleaned on a silica column (15 mm in diameter and 200 mm in length). This column consists of a slurry of 5 g deactivated silica (deactivated with 8% MilliQ water) and 15 mL cyclohexane overlaid with 1 cm anhydrous sodium sulfate. The column was prewashed with 40 mL cyclohexane. The sample was eluted with 100 mL cyclohexane, and the extract was reduced to 0.5 mL by evaporation and transferred to a small vial with a screw-cap.

Prior to analyses all extracts were further reduced to approximately 50 µL by a gentle stream of nitrogen.

### *S I.3 Analyses*

In order to monitor recovery rates for the extraction and clean-up procedures, the PUF disk were added a mixture containing 20 µL of each internal standard prior to extraction and clean-up. This

standards consist of a range of  $^{13}\text{C}$  – labeled polychlorinated biphenyls (PCB) congeners ( $^{13}\text{C}$  PCB-28,-52,-101,-105,-114,-118,-123,-138,-153,-156,-157,-167,-180,-189, -209) and organochlorine pesticides (OCPs) ( $^{13}\text{C}$   $\alpha$ ,  $\beta$ ,  $\gamma$ - hexachlorocyclohexane (HCH),  $^{13}\text{C}$ -hexachlorobenzene (HCB),  $^{13}\text{C}$  *p,p'*- dichlorodiphenyldichloroethylene (DDE) and  $^{13}\text{C}$  *p,p'*-dichlorobiphenyldichloroethane (DDT),  $^{13}\text{C}$  trans-nonachlor,  $^{13}\text{C}$  trans-chlordane,  $^{13}\text{C}$  dieldrine and  $^{13}\text{C}$  Mirex). For the PAHs, a mixture of deuterium labeled polyaromatic hydrocarbons (PAH) congeners (2-methylnaphthalene-  $\text{d}_{10}$ , acenaphthene-  $\text{d}_{10}$ , anthracene-  $\text{d}_{10}$ , pyrene-  $\text{d}_{10}$ , benz(a)anthracene-  $\text{d}_{12}$ , benz(e)pyrene-  $\text{d}_{12}$ , benz(ghi)perylene-  $\text{d}_{12}$ ), were added. All standards were purchased from LGC, formerly Promochem AB (Borås, Sweden). In order to quantify the recovery of the internal standards, the extracts were added recovery standards. 10  $\mu\text{L}$  of recovery standard consisting of deuterated PAHs (biphenyl- $\text{d}_{10}$ , fluorantene- $\text{d}_{10}$  and perylene- $\text{d}_{12}$ ) were added to the PAH extracts, while 20  $\mu\text{L}$  of a recovery standard (1.2.3.4-tetrachloronaphthalene) were added to the acid resistant extracts.

Analysis of the PCB congeners,  $\alpha$ -HCH,  $\beta$ -HCH,  $\gamma$ -HCH, *p,p'*-DDE, *p,p'*-DDD, *o,p'*-DDT and *p,p'*-DDT, HCB, together with the PRC compounds were performed with GC/HRMS on an Agilent 6890N gas chromatograph coupled to a Waters AutoSpec mass spectrometer in electron impact (EI) mode (Table S3). The different PCB congeners and some of the PRCs (PCB-23,-30,-32,-107,-198) were separated using a HT-8 (50 m $\times$ 0.22 mm inner diameter (SGE)) fused silica capillary column (Table S3). The GC was operating in splitless mode with helium as a carrier gas. 1  $\mu\text{L}$  was injected at an injector temperature on 280°C. See Table S3 for more detailed information concerning the temperature program. Separation of  $\alpha$ -HCH,  $\beta$ -HCH,  $\gamma$ -HCH, *p,p'*-DDE, *p,p'*-DDD, *o,p'*-DDT and *p,p'*-DDT, together with the PRCs (PCB-12,-14, D6  $\gamma$ -HCH) compounds were done by use of a HP-1 (25 m $\times$ 0.2 mm inner diameter (J&W Scientific)) fused silica column. 1  $\mu\text{L}$  was injected by an autosampler on the split/splitless injection port in splitless mode with helium as a carrier gas (flow rate 1 mL/min). See Table S3 for detailed specification for the temperature program. During the GC run, *p,p'*-DDT could be thermally converted to *p,p'*-DDD and *p,p'*-DDE. This is eluded due to use of  $^{13}\text{C}$  labeled *p,p'*-DDT as an internal standard.  $^{13}\text{C}$  *p,p'*-DDT may format to  $^{13}\text{C}$ -DDD/DDE, which are compounds that are not included in the internal standard. If the peak area of  $^{13}\text{C}$ -DDD/DDE >5% of the peak area of  $^{13}\text{C}$  *p,p'*-DDT, that result will be rejected.

Analysis of PAHs was carried out by a GC/LRMS on an Agilent 6890N gas chromatograph coupled to an Agilent 5973 mass spectrometer in an electron impact (EI) mode (Table S3). 1 µL was injected by an auto sampler on the split/splitless injection port in splitless mode with helium as a carrier gas (flow rate ~1 mL/min), with a temperature program as detailed in Table S3.

Analysis of the pesticides (trans-chlordane, cis-chlordane, trans-nonachlor, cis-nonachlor) was carried out by a GC/LRMS on a Agilent 6890N gas chromatograph coupled to a Agilent 5973 mass spectrometer in a electron capture negative ion (ENCI) mode. 1 µL was injected by an auto sampler on the split/splitless injection port in splitless mode with helium as a carrier gas (flow rate 1 mL/min). See Table S3 for the temperature program.

#### *S 1.4 Internal standard recoveries*

The internal standard recoveries for the deployed samples, field and method blanks, were to a large extent at the same level (Table S2), which address minimal matrix interferences from the deployed samples governed due to exposure. Nonetheless, some sites are experiencing higher recoveries for some of the internal standards. One of the parallels at the Spitsbergen site had a high percentage recovery for <sup>13</sup>C *p,p'*-DDE. High recovery was also found for the field blank from Košetice for this internal standard.

#### *S 1.5 PRC recoveries*

The second recovery values were for the added mixture of PRCs. These values lie in the range of 57-116 % The range in percentage recovery is governed from each PRC (8) in the field and method blank individually (Table S2). The lower values in the range originates from PCB-30, which had to be corrected towards two internal standards (<sup>13</sup>C HCB and <sup>13</sup>C PCB-28). The higher recovery values for one of the method blanks may be caused by adding too much of the PRC solution to the PUF-disk. i.e. when comparing the recoveries from the different compounds in the same sample, it seems to be over all a high compound recovery for this sample.

### *S 1.6 Duplicate passive air samplers at selected sites*

Figure S2 (a-f) compares selected results for the six EMEP POPs sites where two samplers were co-located (Fig S1), while Table S4 additionally lists relative deviations, expressed as the percentage deviation from the average of these two parallels. The error bars in Fig. S2 are included to illustrate the uncertainty associated with the chemical analysis alone, which was estimated to be ~35 % (Section 3.4).

The relative deviation for PCBs between the two replicates was less than 10 % at four out of six sites and ranged from 4 % (Košetice, Stórhöfði) to 30 % for  $\Sigma_n$ PCBs (Spitsbergen) (Table S4). Among individual PCBs, larger differences tended to occur for substances and sites experiencing lower concentrations (Spitsbergen, Pallas). However, differences of 20% or more were also seen for PCB-28 and 52 at the Råö site (Table S4) in spite of the relatively high air concentrations at this site (Fig S2a). Differences in wind speed experienced between the two replicates may have contributed to some of the deviations observed (Tuduri et al., 2006). If the two parallels were subject to different effective windspeeds, then this would lead to differences in loss of PRCs and hence estimated sampling rates. The resulting site-specific sampling rates and ranges which could be determined for 5 out of 6 sites were: Košetice ( $3.78 \text{ m}^3 \text{ day}^{-1} \pm 5.0\%$ ); Pallas ( $3.63 \text{ m}^3 \text{ day}^{-1} \pm 22.8\%$ ); Stórhöfði ( $11.22 \text{ m}^3 \text{ day}^{-1} \pm 2.8\%$ ); Birkenes ( $3.31 \text{ m}^3 \text{ day}^{-1} \pm 8.3\%$ ) and Råö ( $7.29 \text{ m}^3 \text{ day}^{-1} \pm 14.3\%$ ) (Table S1). Furthermore, sample A had a higher sampling rate than sample B for Stórhöfði and Råö, while sample B was higher than sample A for Košetice, Pallas and Råö. Among the sites for which site-specific sampling rates could be determined, larger differences in loss of PRCs were found at Pallas and Råö. Yet, while loss of 6 PRCs were used to estimate the sampling rate for both samples from Råö, only 2 and 4 PRCs were used for Pallas. Hence, we are less confident about the estimated sampling rate for Sample A from Pallas (Table S1) which, in turn, makes it difficult to conclude that the two parallels at Pallas were subject to significantly different windspeeds. The results for Råö rather suggest that the differences observed between the two parallels are more of an analytical character as sample A had a higher sampling rate in comparison to sample B while estimated air concentrations were consistently higher for sample A (Fig S2). Figure S2 (b,c) show results for  $\alpha$ -HCH and  $\gamma$ -HCH. The relative deviations for  $\alpha$ - and  $\gamma$ -HCH were always less than 20 % and ranged from 1 to 13 % and 2 to 18 %, respectively (Table S4). Figure S2d) shows the results for  $\Sigma_n$ DDTs where n varies between the sites. Both

replicates at Stórhöfði and Spitsbergen had concentrations below the MDL for all DDTs and are therefore not included in Fig. S2d). Concentrations under the MDL were also experienced at Birkenes and Pallas and hence a comparison for all four DDT isomers was only possible for Košetice and Råö. The larger deviations among the latter two sites were found for Råö where both the relative difference in sampling rates were larger and air concentrations much lower in comparison to Košetice (Fig. S2d). Figure S2e) shows the results for  $\Sigma_n$ PAHs, where n varies from 1 (Stórhöfði) to 8 (Košetice), while no comparison could be made for Spitsbergen. The relative deviation between the replicates ranged from 2 % (Košetice) to 25 % (Pallas) for  $\Sigma_n$ PAHs. The better agreement found for the Košetice (2 %) site (Table S4) may be attributed to the higher concentration of PAHs experienced at this site (Fig. S2e) in combination with a limited difference in sampling rates compared to Pallas. Figure S2f) shows the results for HCB. The difference between the two parallels ranged from 1 to 22 %. A very good agreement was found at Stórhöfði, Košetice, Birkenes and Råö with 1, 2, 4 and 8 % respectively, while larger discrepancies (~20 %) were observed at the northern sites at Pallas and Spitsbergen. In general, we conclude that there is a reasonable agreement between the two replicates for most substances, with a tendency for better agreement for those substances (e.g. HCHs, HCB) and sites (e.g. Košetice) which tend to experience higher concentrations in air.



160   **References**

161   Tuduri, L., Harner, T., and Hung, H.: Polyurethane foam (PUF) disks passive air samplers: Wind effect on  
162   sampling rates, *Environmental Pollution*, 144, 377-383, 10.1016/j.envpol.2005.12.047, 2006.

163

164

## Figures

Figure S1 EMEP POP measurement network, showing sites for which both air and precipitation measurements are carried out. Sites presented with names are localities for which POPs were monitored in air using AAS in 2006.

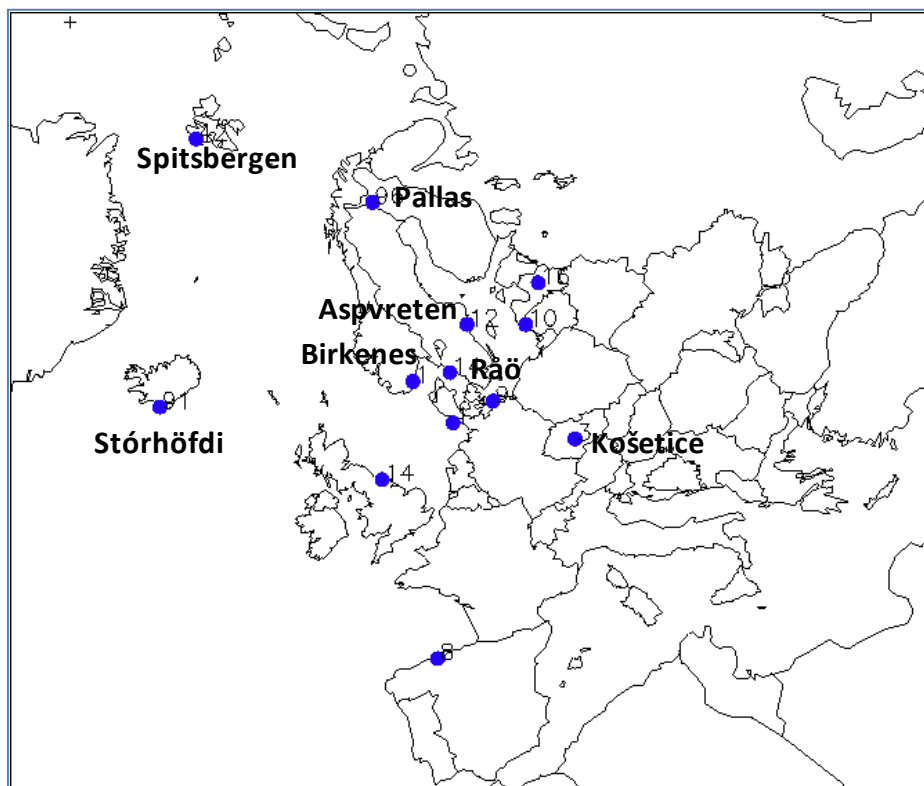

Figure S2 Comparison of selected PAS results for two parallels at six EMEP sites. Note that all results are expressed on a logarithmic scale due to large variability across sites. Secondly, the sum of PCBs, DDTs and PAHs only includes those substances (n) for which both samples at a given site were found to be above MDL. The error bars indicates an estimated uncertainty of +/-35% associated with the chemical analysis alone.

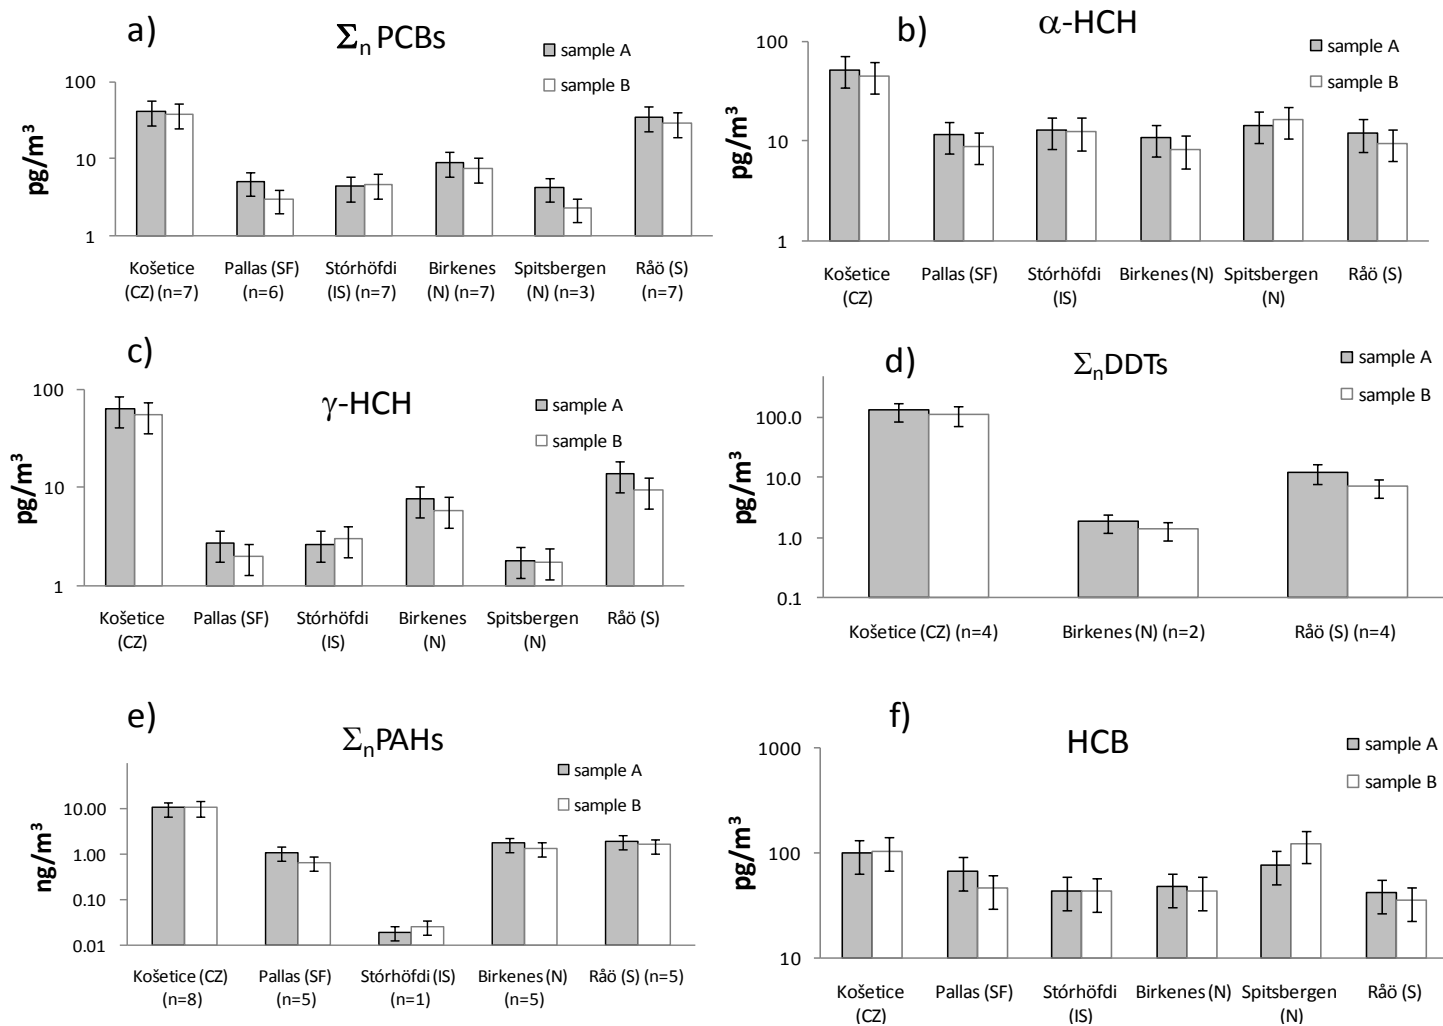

Figure S3 Spatial pattern of individual PCBs in European background air.

Figure S3a)

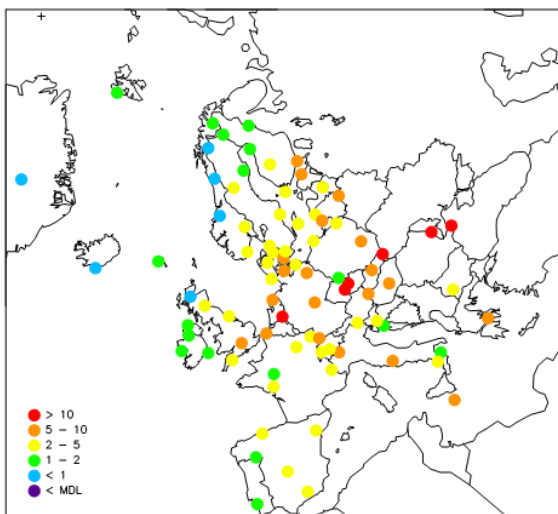

PCB-28 (pg/m<sup>3</sup>)

Figure S3b)

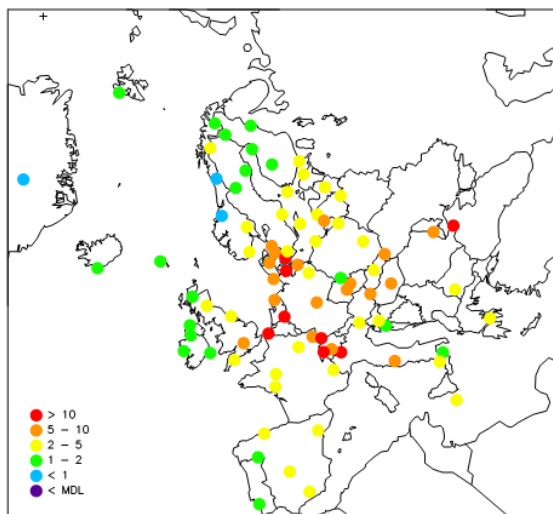

PCB-52 (pg/m<sup>3</sup>)

Figure S3c)

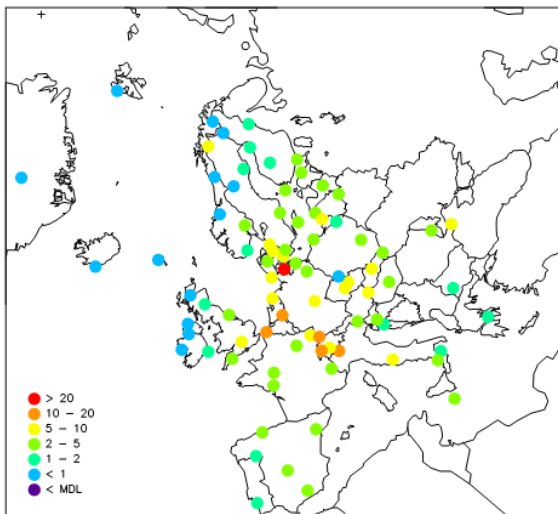

PCB-101 (pg/m<sup>3</sup>)

Figure S3d)

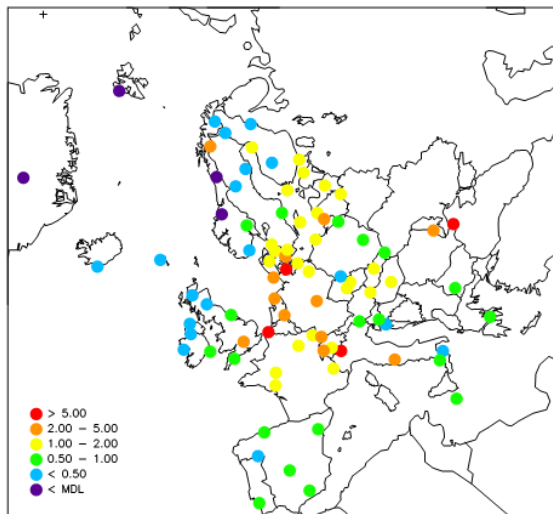

PCB-118 (pg/m<sup>3</sup>)

Figure S3e)

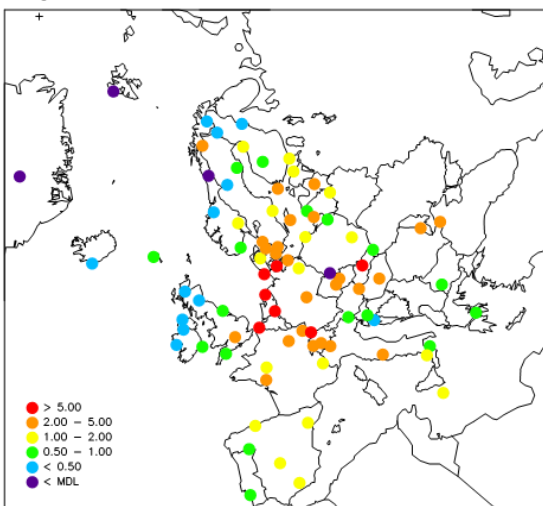

PCB-138 (pg/m<sup>3</sup>)

Figure S3f)

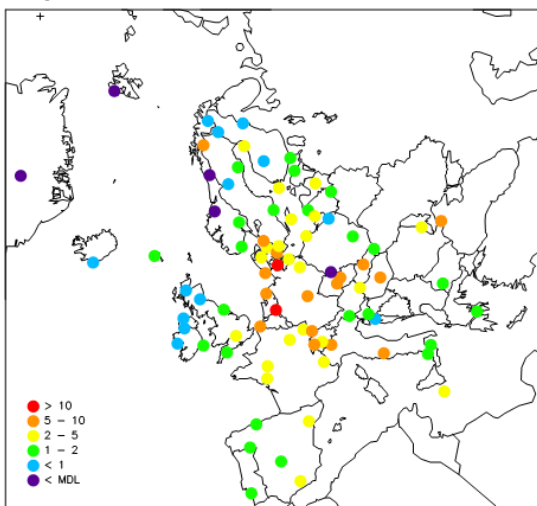

PCB-153 (pg/m<sup>3</sup>)

Figure S3g)

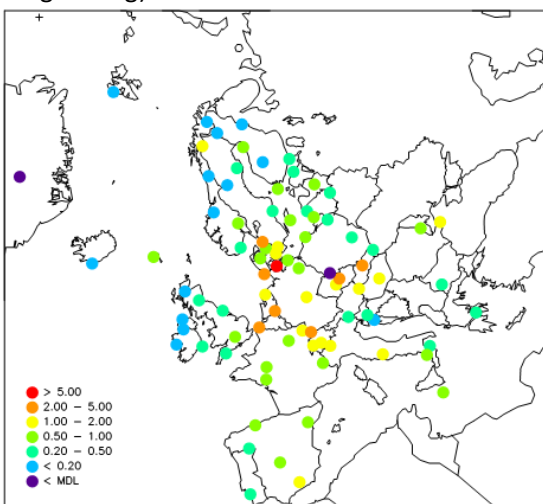

PCB-180 (pg/m<sup>3</sup>)

Figure S4 Spatial pattern of individual HCHs in European background air.

Figure S4a)

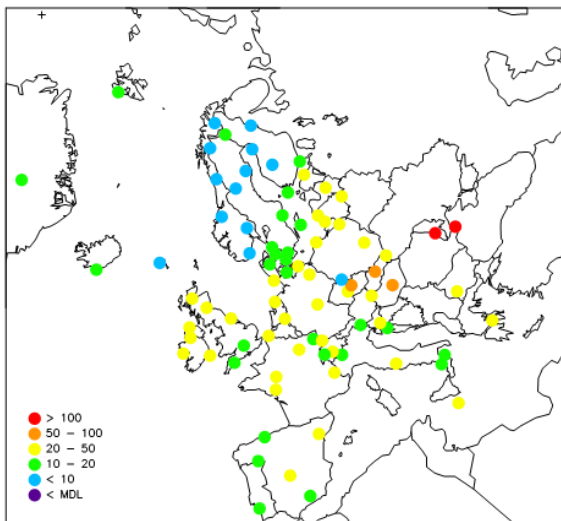

$\alpha$ -HCH ( $\text{pg}/\text{m}^3$ )

Figure S4b)

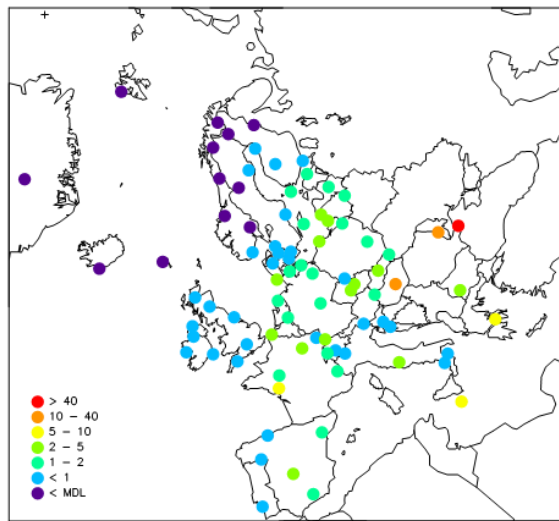

$\beta$ -HCH ( $\text{pg}/\text{m}^3$ )

Figure S4c)

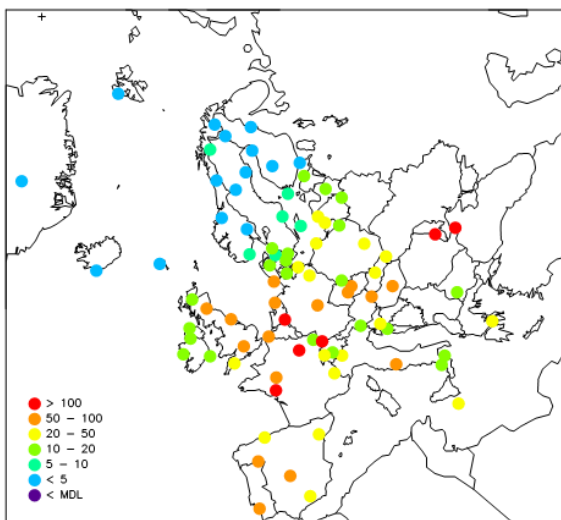

$\gamma$ -HCH ( $\text{pg}/\text{m}^3$ )

Figure S5 Spatial pattern of individual DDTs in addition to  $p,p'$ -DDT/  $p,p'$ -DDE and  $o,p'$ -DDT/  $p,p'$ -DDT ratios in European background air.

Figure S5a)

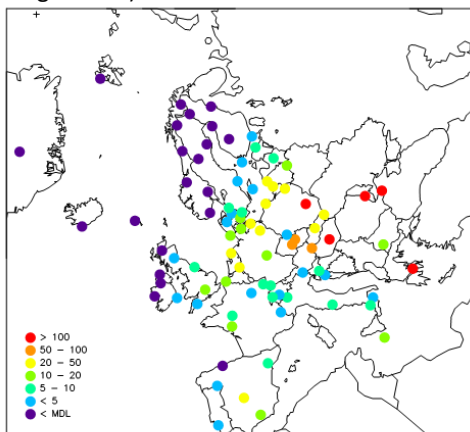

$p,p'$ -DDE (pg/m<sup>3</sup>)

Figure S5b)

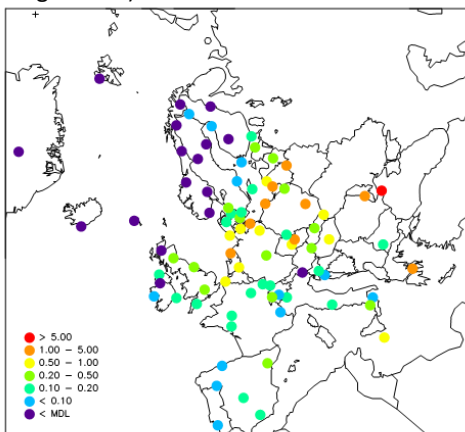

$p,p'$ -DDD (pg/m<sup>3</sup>)

Figure S5c)

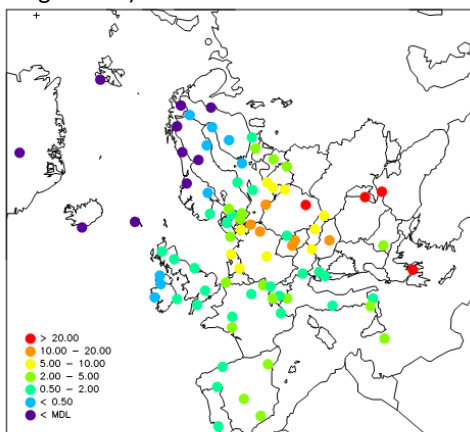

$o,p'$ -DDT (pg/m<sup>3</sup>)

Figure S5d)

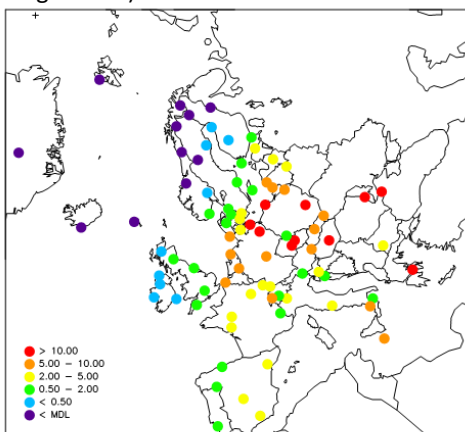

$p,p'$ -DDT (pg/m<sup>3</sup>)

Figure S5e)

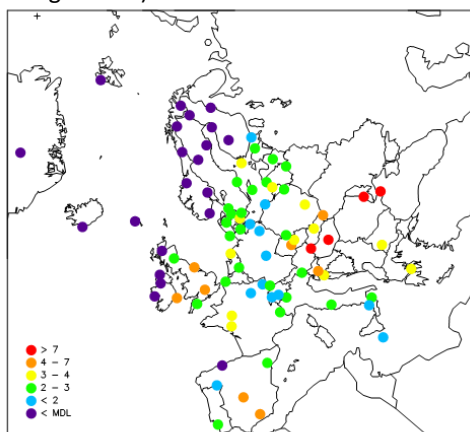

$p,p'$ -DDE/ $p,p'$ -DDT ratio

Figure S5f)

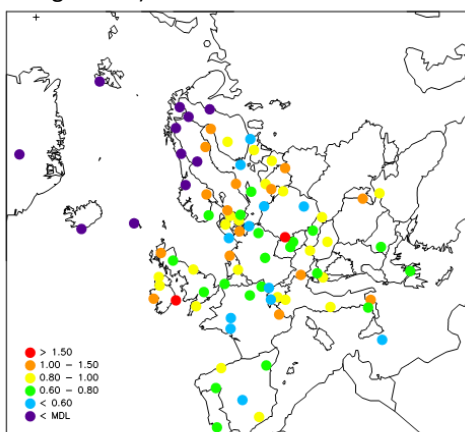

$o,p'$ -DDT/ $p,p'$ -DDT ratio

Figure S6 Spatial pattern of individual PAHs in European background air.

Figure S6a)

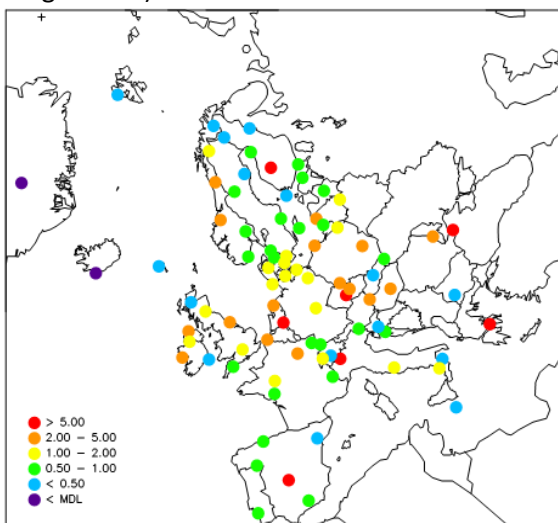

Fluorene (ng/m³)

Figure S6b)

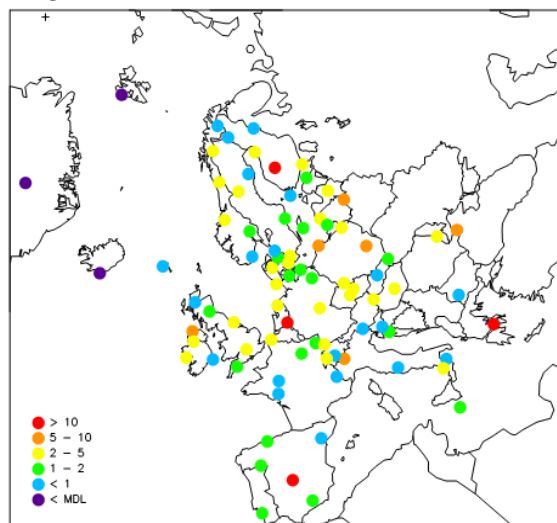

Phenanthrene (ng/m³)

Figure S6c)

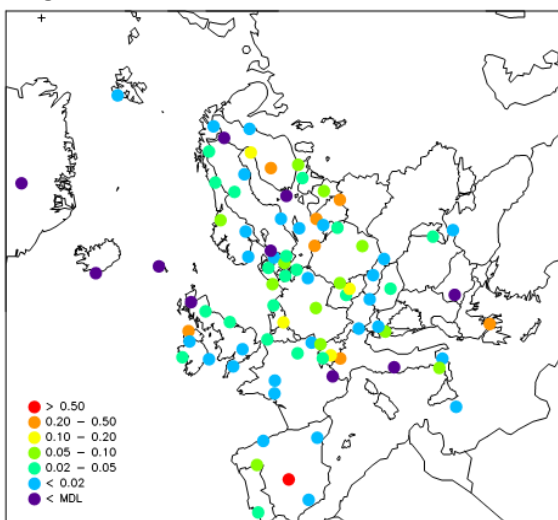

Anthracene (ng/m³)

Figure S6d)

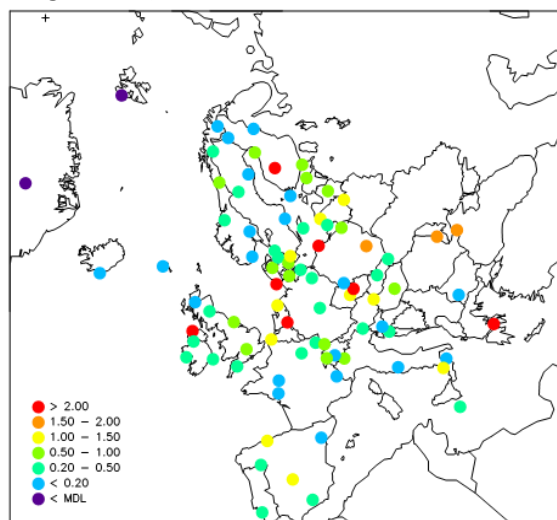

Fluoranthene (ng/m³)



Figure S6e)

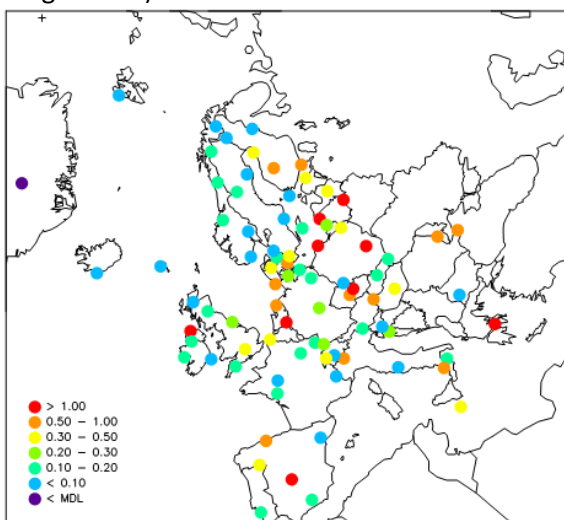

Pyrene (ng/m³)

Figure S6f)

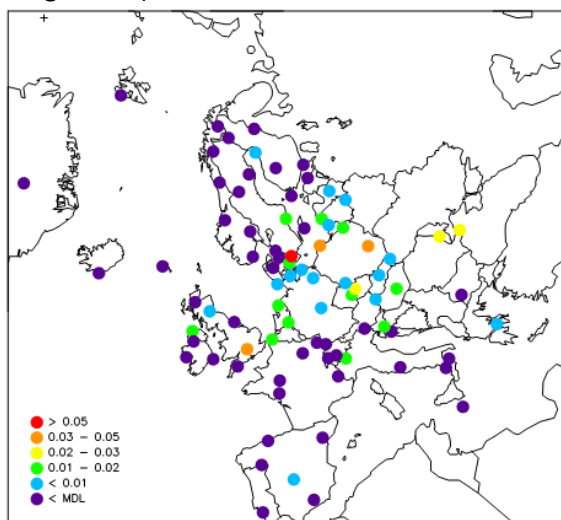

Benzo(a)pyrene (ng/m³)

Figure S6g)

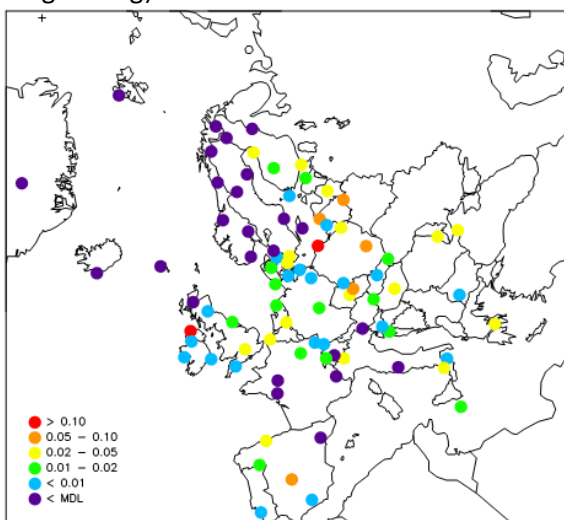

Benzo(a)anthracene (ng/m³)

Figure S6h)

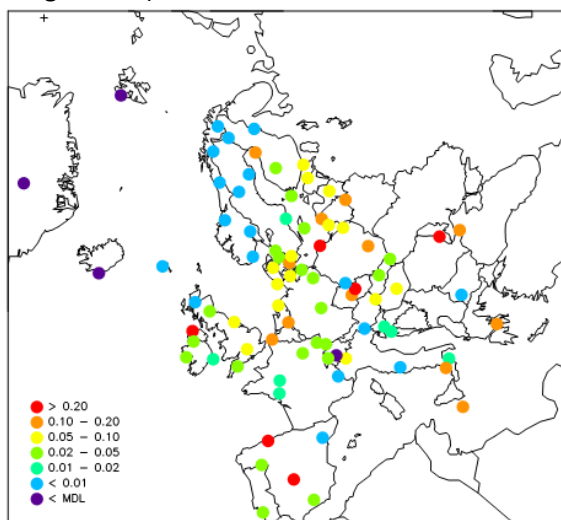

Chrysene (ng/m³)

Figure S7 Spatial pattern of individual chlordanes in European background air.

Figure S7a)

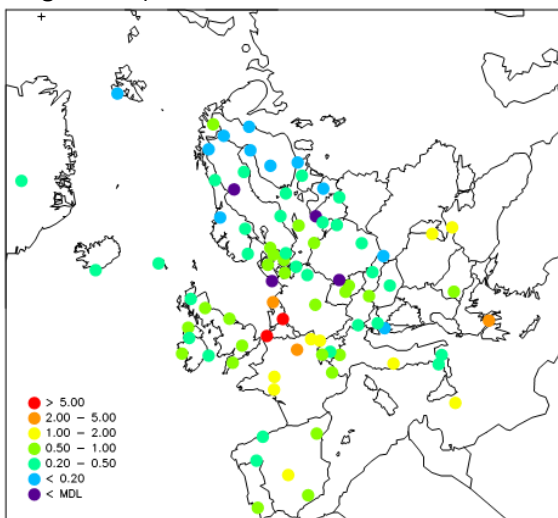

trans-chlordane ( $\text{pg/m}^3$ )

Figure S7b)

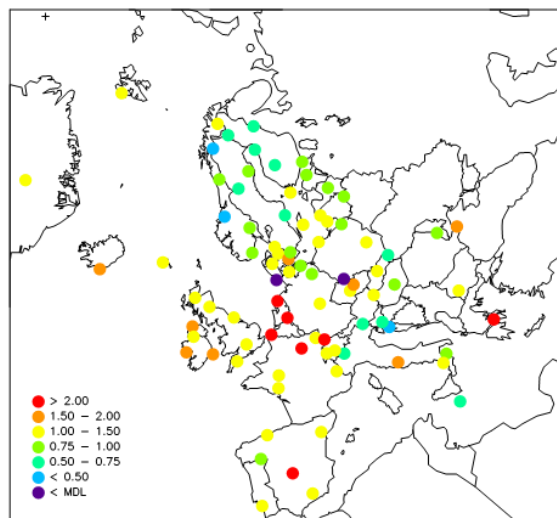

cis-chlordane ( $\text{pg/m}^3$ )

Figure S7c)

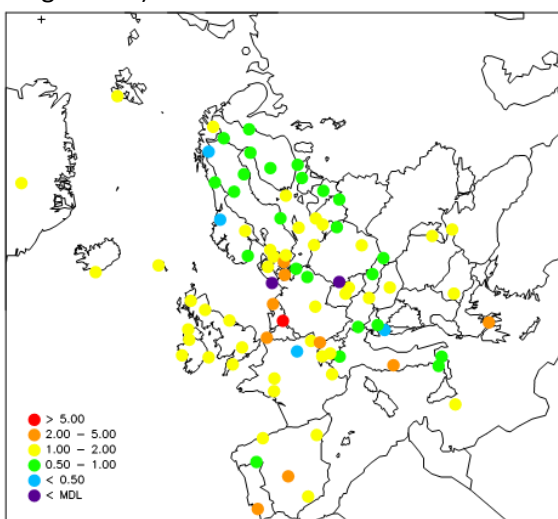

trans-nonachlor ( $\text{pg/m}^3$ )

Figure S7d)

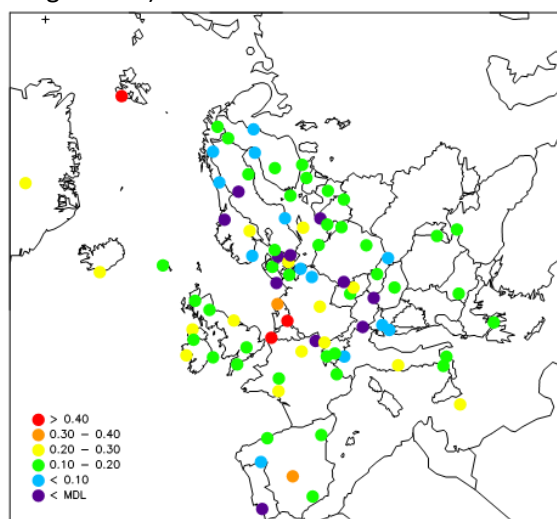

cis-nonachlor ( $\text{pg/m}^3$ )

Figures S8-S22: Maps of Footprint ES (emission sensitivity) (a) and EC (emission contribution) (b) for PCB-28 for the PAS sampling period (see text) at selected sites.

Figure S8a)

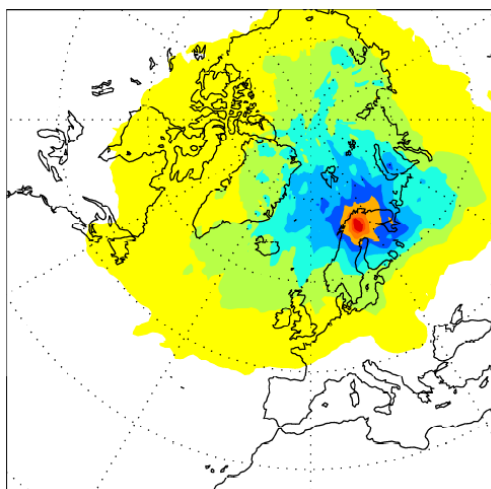

ES map [ $\text{ns}/\text{m}^3$ ] Pallas

Figure S9a)

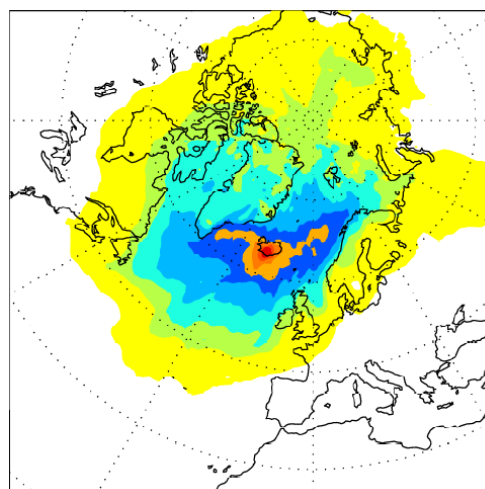

ES map [ $\text{ns}/\text{m}^3$ ] Stórhöfði

Figure S8b)

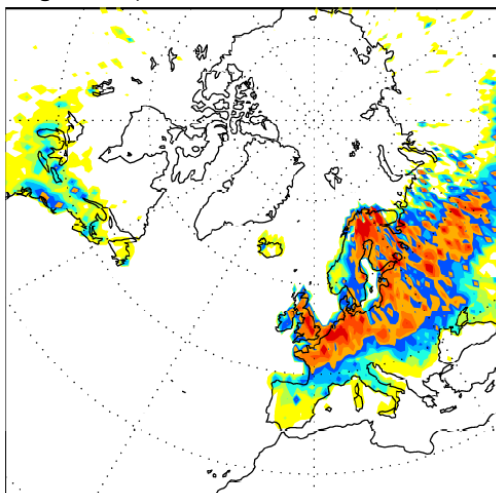

EC map  $1\text{E}-12$  [ $\text{pg}/\text{m}^5$ ] Pallas

Figure S9b)

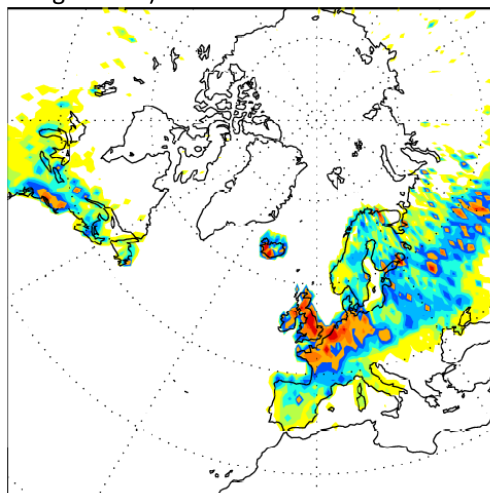

EC map  $1\text{E}-12$  [ $\text{pg}/\text{m}^5$ ] Stórhöfði

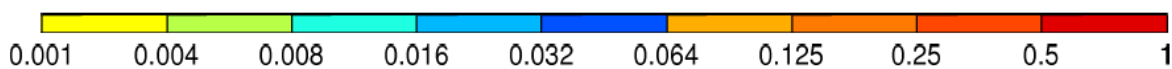

Figure S10a)

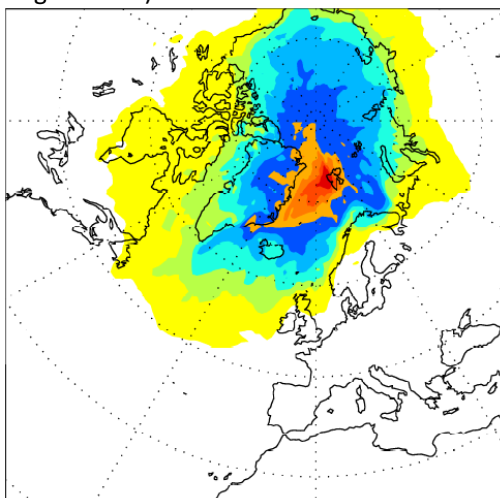

ES map [ $\text{ns/m}^3$ ] Spitsbergen

Figure S11a)

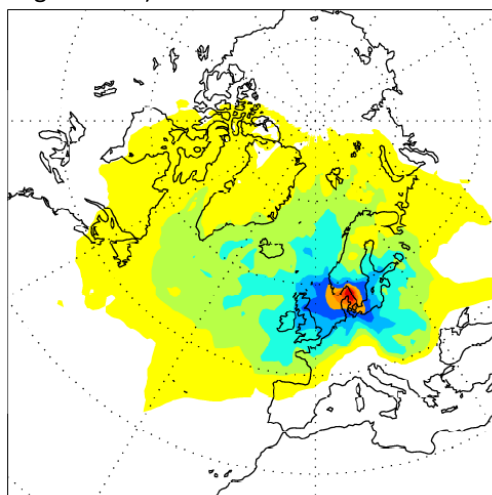

ES map [ $\text{ns/m}^3$ ] Råö

Figure S10b)

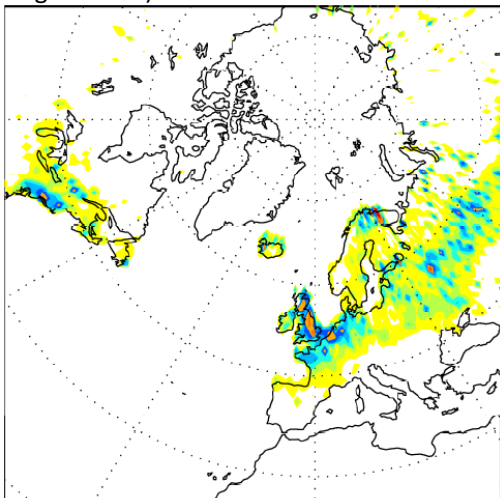

EC map  $10^{-12} \text{ [pg/m}^3\text{]}$  Spitsbergen

Figure S11b)

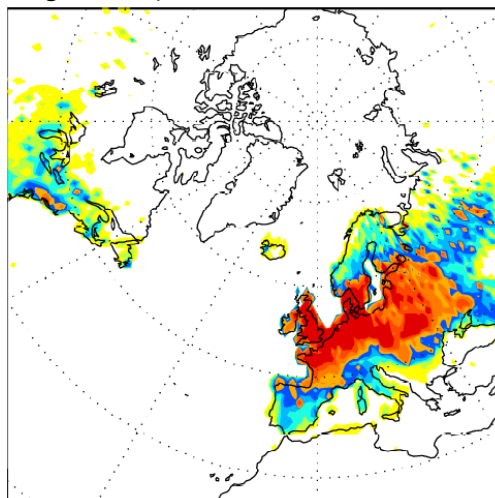

EC map  $10^{-12} \text{ [pg/m}^3\text{]}$  Råö

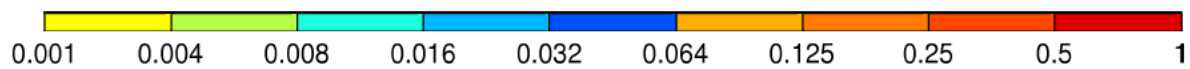

Figure S12a)

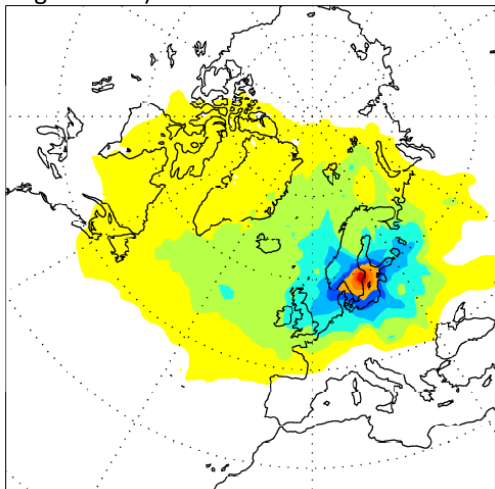

ES map [ns/m<sup>3</sup>] Aspvreten

Figure S13a)

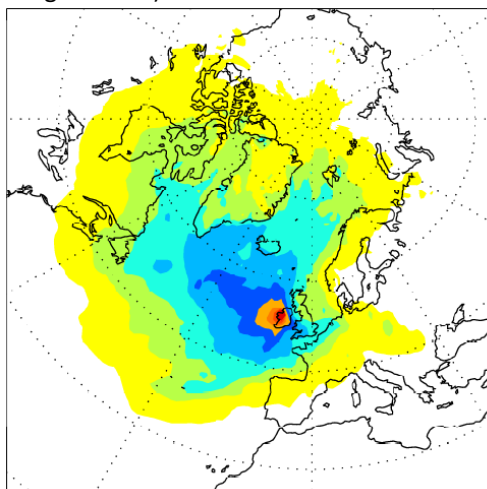

ES map [ns/m<sup>3</sup>] Mace Head

Figure S12b)

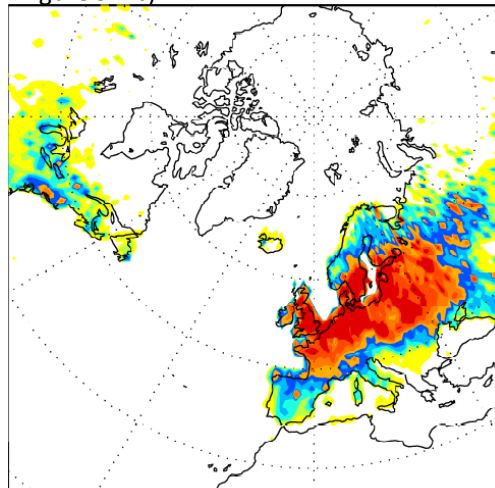

EC map 1E-12 [pg/m<sup>5</sup>] Aspvreten

Figure S13b)

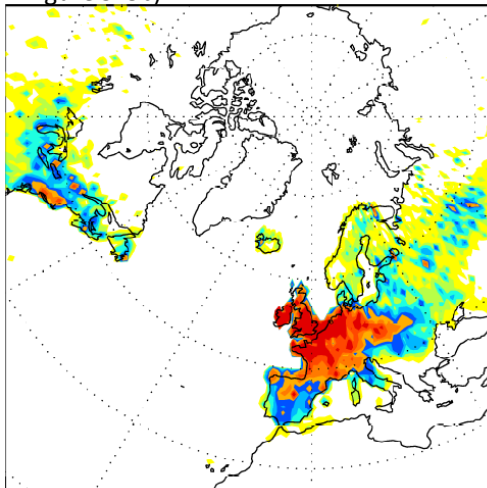

EC map 1E-12 [pg/m<sup>5</sup>] Mace Head

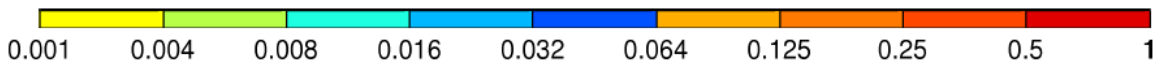

Figure S14a)

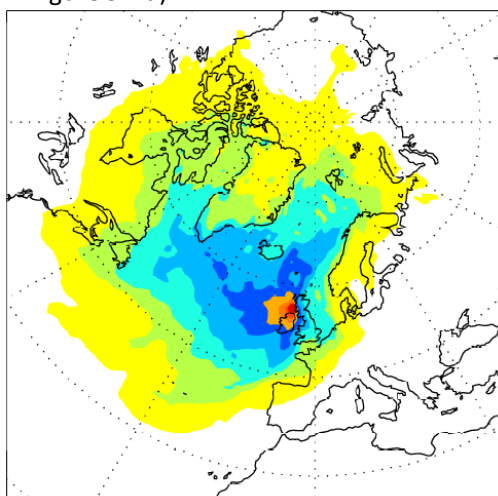

ES map [ns/m<sup>3</sup>] Malin Head

Figure S15a)

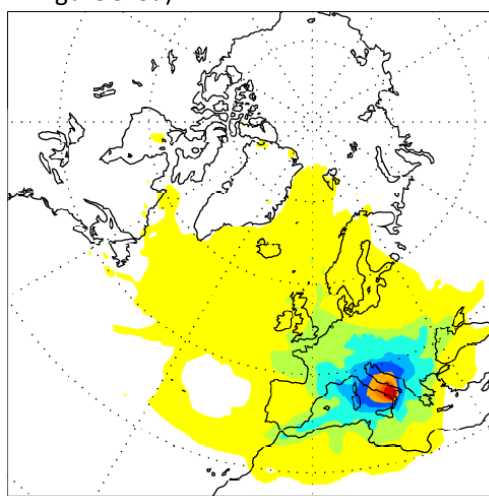

ES map [ns/m<sup>3</sup>] Longobucco

Figure S14b)

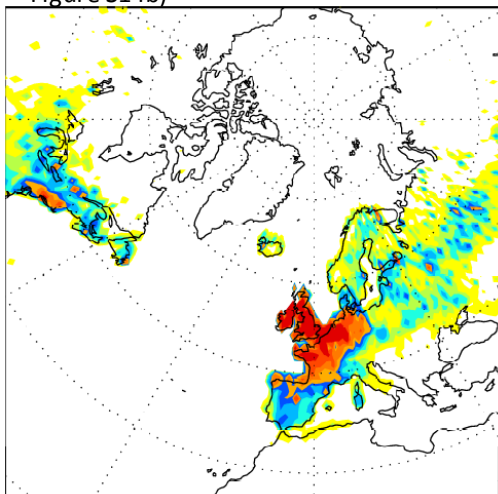

EC map 1E-12 [pg/m<sup>5</sup>] Malin Head

Figure S15b)

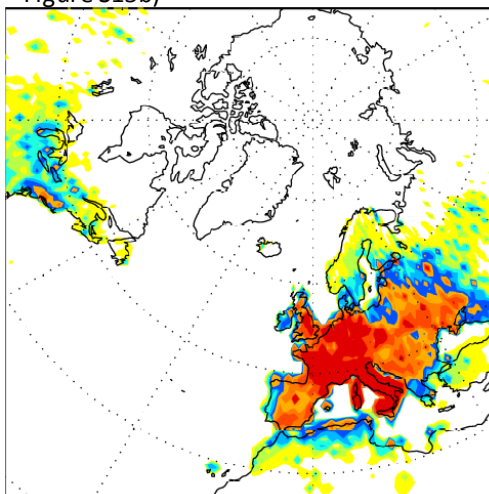

EC map 1E-12 [pg/m<sup>5</sup>] Longobucco

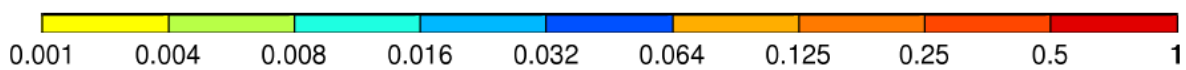



Figure S16a)

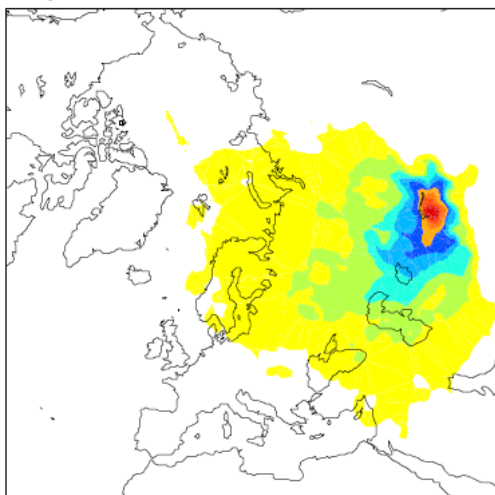

ES map [ns/m³] Borovoje

Figure S17a)

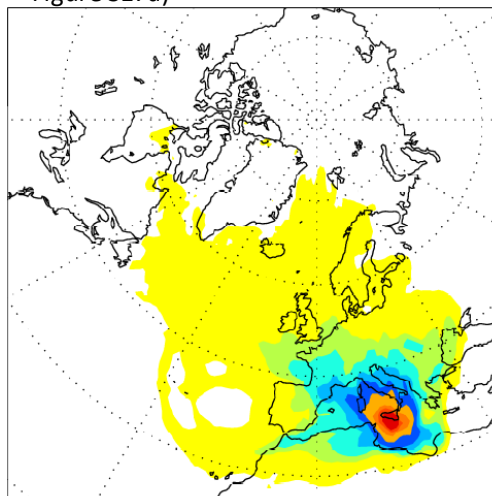

ES map [ns/m³] Giordan Lighthouse

Figure S16b)

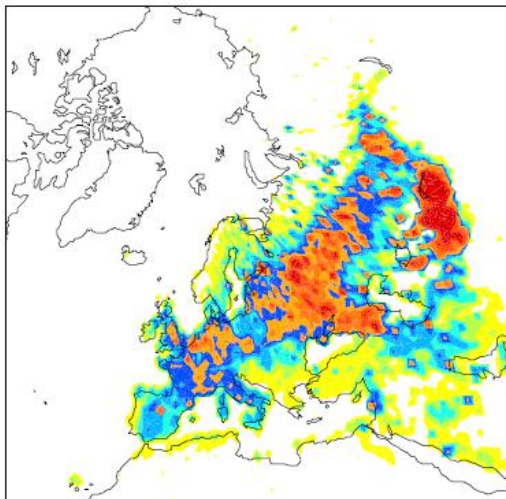

EC map 1E-12 [pg/m⁵] Borovoje

Figure S17b)

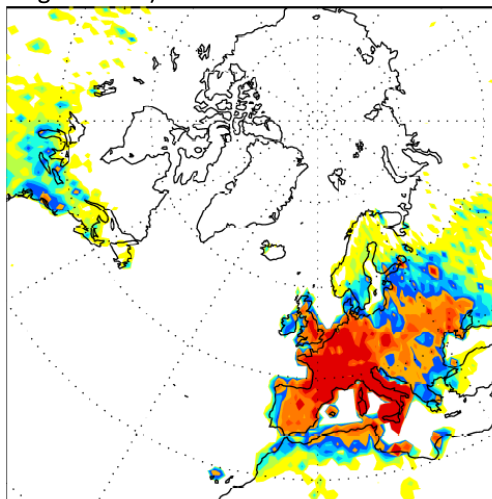

EC map 1E-12 [pg/m⁵] Giordan Lighthouse

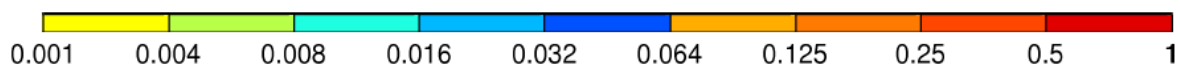

Figure S18a)

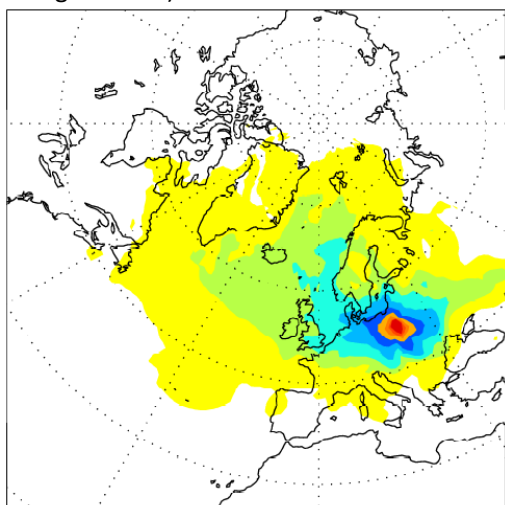

ES map [ns/m³] Jarczew

Figure S19a)

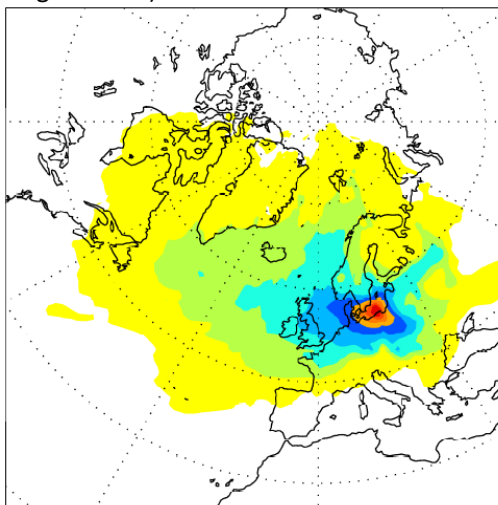

ES map [ns/m³] Leba

Figure S18b)

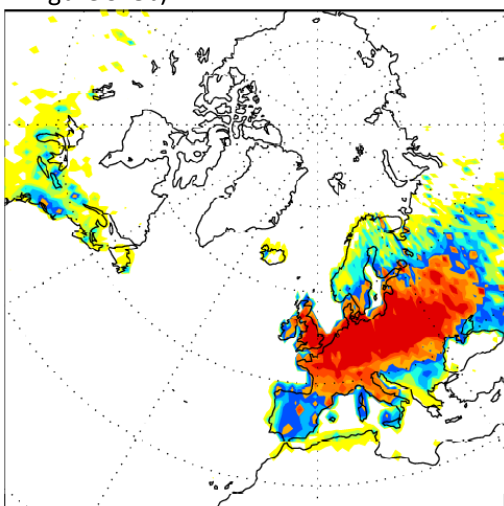

EC map 1E-12 [pg/m³] Jarczew

Figure S19b)

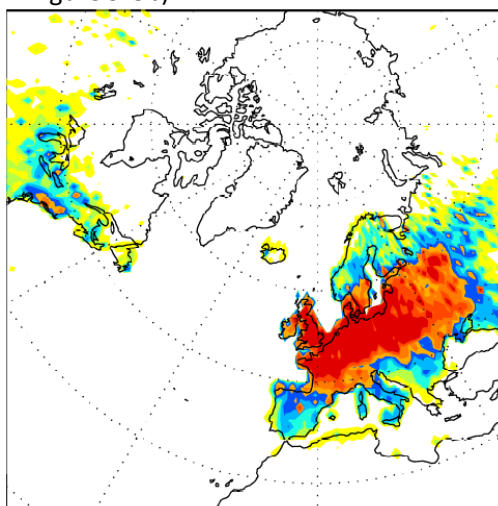

EC map 1E-12 [pg/m³] Leba

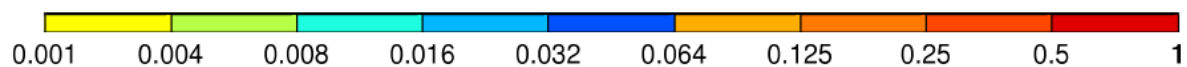



Figure S20a)

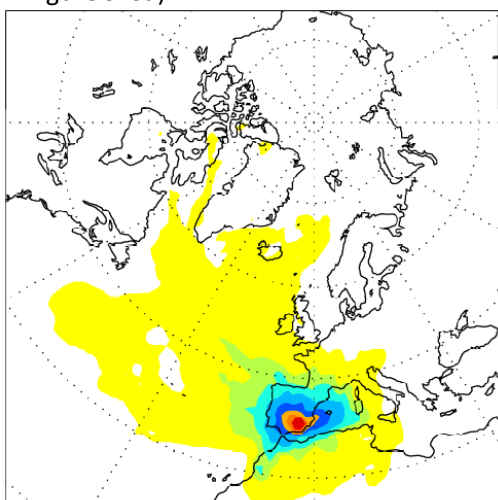

ES map [ns/m<sup>3</sup>] Viznar

Figure S21a)

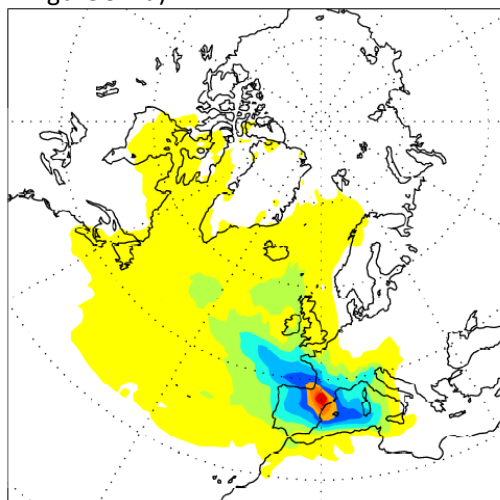

ES map [ns/m<sup>3</sup>] Els Torms

Figure S20b)

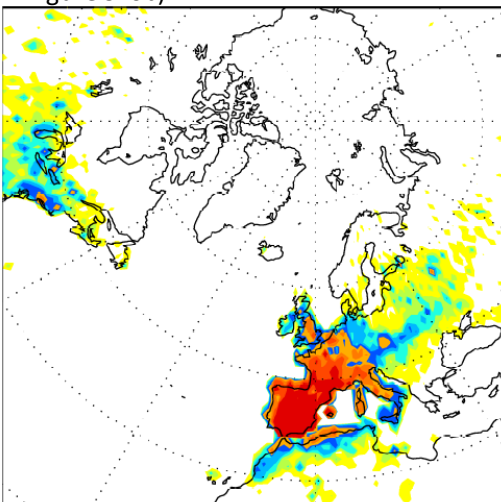

EC map 1E-12 [pg/m<sup>3</sup>] Viznar

Figure S21b)

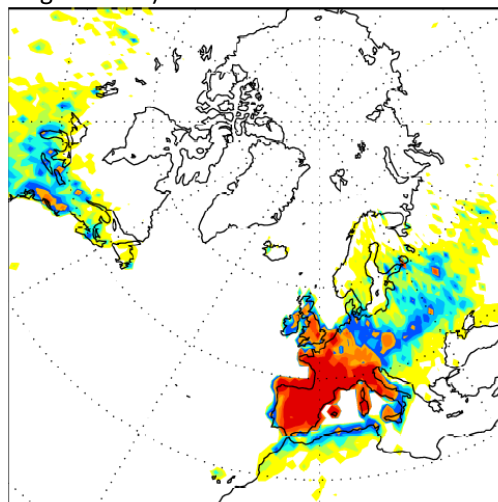

EC map 1E-12 [pg/m<sup>3</sup>] Els Torms

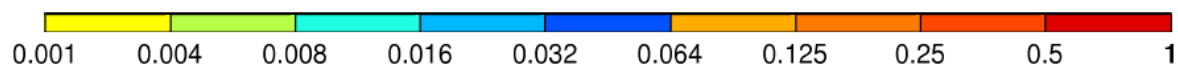

Figure S22a)

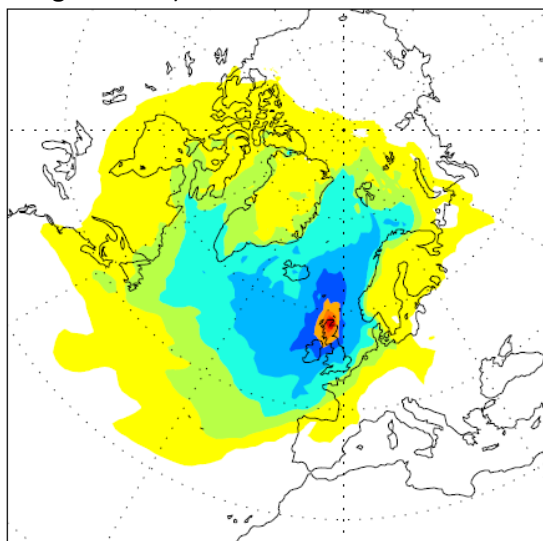

ES map [ns/m³] Strath Vaich Dam

Figure S22b)

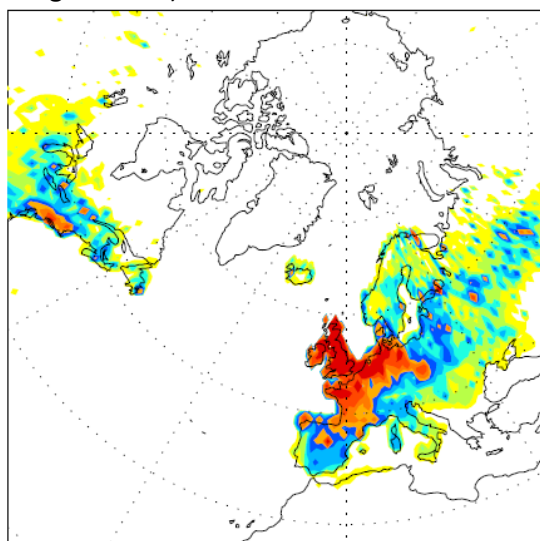

EC map 1E-12 [pg/m³] Strath Vaich Dam

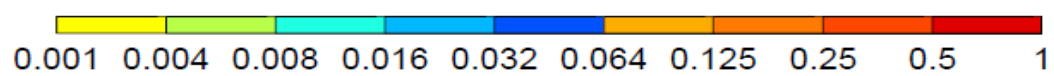

Figure S23-S24 Maps of Footprint ES (emission sensitivity) (a) and EC (emission contribution) (b) for PCB-28 for the AAS sampling period (see text) at Birkenes (23) and Košetice (24) respectively.

Figure S23a)

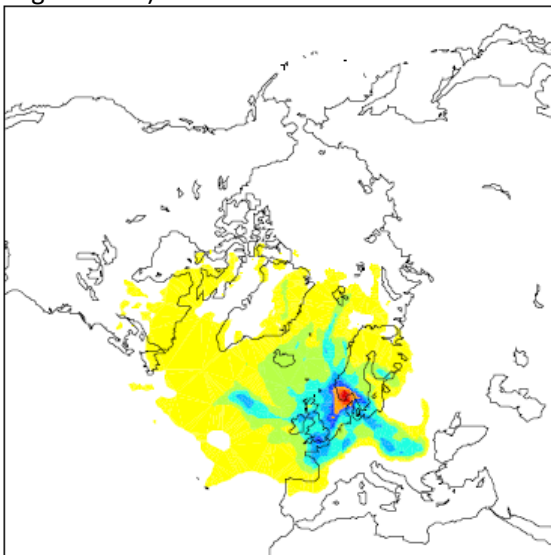

ES map [ns/m<sup>3</sup>] Birkenes

Figure S24a)

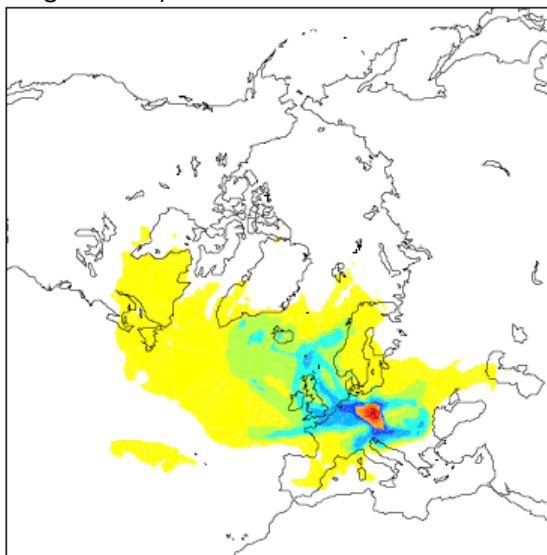

ES map [ns/m<sup>3</sup>] Košetice

Figure S23b)

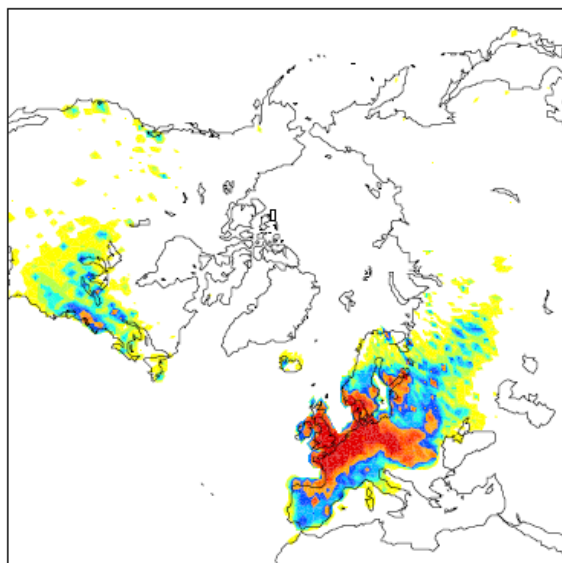

EC map 1E-12 [pg/m<sup>5</sup>] Birkenes

Figure S24b)

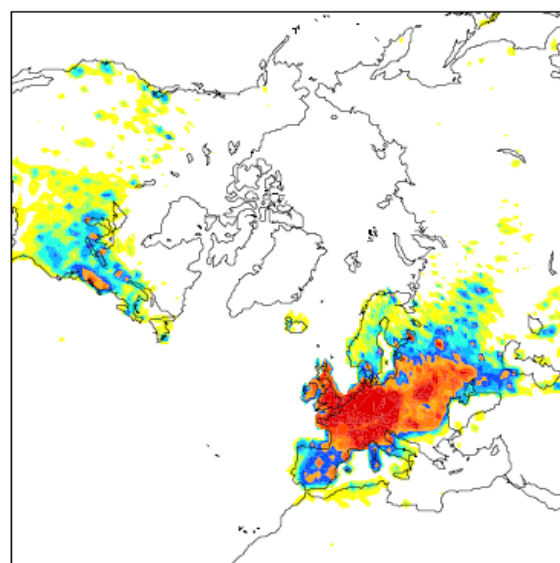

EC map 1E-12 [pg/m<sup>5</sup>] Košetice

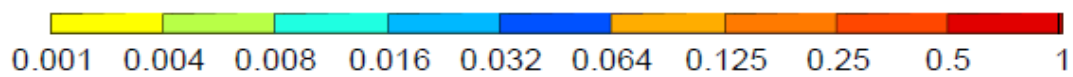

Supplement: Supplementary file 1 [file acp-11-1549-2011-supplement.zip]
