# Supplementary material for: Spatial variability of POPs in European background air
Source: Copernicus journal article supplement (doi:10.5194/acp-11-1549-2011), 2011-02-17
Supplement: Supplementary file 1 [file Halse SI Data Jan7.xlsx]

## Sheet: Raw data
Country	EMEP sites	Starion name	Latitude	Longitude	Sample start	Sample end	PCB-28	PCB-52	PCB-101	PCB-118	PCB-138	PCB-153	PCB-180	S7PCB	a-HCH	b-HCH	g-HCH	Sa, b, g-HCHs	p,p'-DDE	p,p'-DDD	o,p'-DDT	p,p'-DDT	S4DDTs	Fluorene	Phenanthrene	Anthracene	Fluoranthene	Pyrene	Benzo[a]pyrene	Benz[a]anthracene	Chrysene	S8PAH	HCB	trans-Chlordane	cis-Chlordane	trans-Nonachlor	cis-Nonachlor	S4chlordanes
Austria	x	Illmitz	N 47°46	E 16°46	2006-07-27	2006-11-02	7.42341	6.41194	5.44695	1.40634	2.72953	4.55989	1.20129	29.1794	33.1172	1.44913	54.2036	88.7699	71.4062	0.454269	7.58554	8.75346	88.1995	2.92313	4.11552	0.0147452	1.12002	0.52082	0.0107901	0.0177023	0.0842582	8.80698	63.598	0.599447	1.29986	1.35764	0.023674	3.28062
	x	Vorhegg	N 46°40	E 12°58	2006-07-18	2006-10-23	2.39719	2.34499	2.11186	0.56404	0.920692	1.64237	0.375144	10.3563	17.3993	0.42345	19.6064	37.4291	2.97089	0.0299019	1.31387	1.08544	5.4001	0.537847	0.956074	0.0154758	0.27054	0.129053	0.00220172	0.00222936	0.014097	1.92752	34.0182	0.291984	0.693867	0.695491	0.023674	1.70502
Belgium	-	Koksijde	N 51°07	E 02°29	2006-07-04	2006-10-03	8.25653	13.8154	13.7401	5.22688	6.42749	9.69943	2.26031	59.4261	24.5007	2.67168	99.4711	126.644	16.3278	0.713845	4.30102	5.61425	26.9569	2.24828	3.50241	0.0252091	1.23454	0.487604	0.0113829	0.0217505	0.116841	7.64802	52.4407	5.28621	3.68219	4.84374	0.410844	14.223
Bulgaria	-	Moussala	N 42°11	E 23°35	2006-07-06	2006-10-05	3.09327	2.3597	1.80503	0.648133	0.817587	1.25459	0.318578	10.2969	36.0947	2.31747	19.8472	58.2593	12.6123	0.160666	3.10001	3.94378	19.8168	0.153194	0.316764	0.00237089	0.105972	0.051768	0.00220172	0.0024076	0.0139277	0.648605	33.4302	0.541781	1.31427	1.26583	0.185538	3.30742
Croatia	x	Zavizan	N 44°49	E 14°59	2006-07-10	2006-10-10	1.68245	1.43126	1.10697	0.327401	0.459868	0.76606	0.200961	5.97497	18.5026	0.412438	12.9106	31.8257	4.34931	0.0589713	1.23435	1.38933	7.03197	0.695632	1.36612	0.0967308	0.338965	0.272835	0.00220172	0.0111579	0.0211599	2.8048	29.4526	0.16877	0.426081	0.424946	0.0656676	1.08546
Cyprus	-	Ayia Marina	N 33°02	E 33°03	2006-06-29	2006-10-02	1.71871	1.91919	1.23531	0.476889	0.606228	0.82526	0.230067	7.01166	19.3037	1.59264	9.45108	30.3474	14.5172	0.364723	2.03693	6.1961	23.115	0.741411	1.9308	0.0251278	0.500034	0.26401	0.00220172	0.00222936	0.0406788	3.50649	22.7812	0.803141	1.01869	0.918693	0.161551	2.90207
Czech Rep	x	Košetice	N 49°35	E 15°05	2006-07-12	2006-10-12	10.9786	8.07333	6.62531	1.67316	3.96929	6.72651	1.98419	40.0304	49.1673	2.93449	59.9174	112.019	87.4361	0.950733	14.8191	20.7505	123.956	5.0936	3.70779	0.0498008	1.02948	0.550684	0.0162149	0.0398723	0.113894	10.6013	101.838	0.737642	1.37283	1.82309	0.200471	4.13403
	x	Svratouch	N 49°44	E 16°02	2006-07-13	2006-10-13	12.4606	8.24016	7.51406	1.9372	4.57253	7.80877	2.39858	44.9319	61.3443	3.86744	71.5379	136.75	80.2286	1.14343	13.5834	21.614	116.569	3.55184	4.82109	0.184146	2.16762	1.26091	0.0304772	0.0995878	0.207095	12.3228	84.4826	0.79396	1.60845	1.81472	0.214702	4.43183
Denmark	x	Tange	N 56°21	E 09°36	2006-07-07	2006-10-06	4.9037	5.55357	4.55514	1.26946	1.59368	2.64574	0.582741	21.104	10.9862	0.302064	10.5811	21.8694	3.76922	0.111556	1.30543	1.47838	6.66459	1.18536	2.27463	0.0367741	0.720466	0.472763	0.00220172	0.0219528	0.0610986	4.77525	57.7511	0.538267	1.13096	1.41311	0.151577	3.23391
	x	Keldsnor	N 54°44	E 10°44	2006-07-11	2006-10-19	7.54951	19.7042	33.5433	8.25422	18.3145	27.9464	6.08428	121.396	13.0845	1.06558	16.0355	30.1855	13.51	0.638287	5.93268	4.8837	24.9646	1.67388	1.83181	0.0309221	0.528165	0.256307	0.007706	0.0142889	0.0799535	4.42303	67.2317	0.923687	1.41044	2.1107	0.194472	4.6393
	x	Anholt	N 56°43	E 11°31	2006-07-06	2006-10-06	4.37339	5.47211	5.10032	1.54561	2.33696	3.64514	0.840506	23.314	10.6991	0.638179	8.75773	20.095	4.72075	0.144923	1.66563	1.6687	8.20001	0.773002	1.06851	0.00601651	0.368565	0.153101	0.00220172	0.00782173	0.0397063	2.41892	47.2144	0.556555	1.36456	1.51076	0.023674	3.45555
	x	Lille Valby	N 55°41	E 12°08	2006-07-13	2006-10-13	9.32872	12.3047	8.4966	2.68196	3.5772	5.55882	1.30911	43.2571	12.1409	0.688996	14.5668	27.3967	12.9536	0.378608	3.54895	3.95173	20.8329	1.43369	2.73021	0.0640791	0.956113	0.623359	0.0171346	0.0429039	0.135678	6.00318	55.0684	0.872748	1.72941	2.40933	0.287252	5.29874
Estonia	x	Laheema	N 59°30	E 25°54	2006-07-06	2006-10-10	6.29641	4.90218	3.74434	1.98314	1.51404	1.9722	0.360714	20.773	29.2401	1.41754	12.8503	43.508	7.20644	0.387538	2.49361	2.7403	12.8279	0.935565	1.79477	0.0435824	0.537735	0.321713	0.00220172	0.0198115	0.0720917	3.72747	46.4337	0.315642	0.856108	0.913402	0.110848	2.196
Färoe Islands	-	Norðuri á Fossum	N 62°11	W 07°12	2006-07-01	2006-10-02	1.42103	1.20813	0.798589	0.326851	0.546872	1.07621	0.643504	6.02119	9.81346	0.0632495	2.73497	12.6117	0.795154	0.0299019	0.135116	0.0955265	1.0557	0.146024	0.161079	0.00331663	0.0469518	0.031034	0.00220172	0.00222936	0.0093571	0.402193	51.0555	0.310293	1.2759	1.19998	0.186648	2.97282
Finland	x	Pallas	N 67°58	E 24°07	2006-07-19	2006-10-19	1.24776	1.24029	0.869879	0.272491	0.296379	0.390552	0.100328	4.41768	10.3225	0.0632495	2.35921	12.745	0.795154	0.0764559	0.265668	0.0955265	1.2328	0.234099	0.470243	0.00331663	0.108017	0.0554529	0.00220172	0.00222936	0.00916574	0.884725	56.6034	0.187226	0.747952	0.750644	0.106636	1.79246
	x	Ähtari	N 62°33	E 24°13	2006-07-01	2006-10-02	2.0844	1.8792	1.49598	0.488118	0.5615	0.873297	0.161417	7.54391	8.9323	0.199881	3.48046	12.6126	0.795154	0.0299019	0.432999	0.454585	1.71264	7.48763	17.8325	0.247303	2.17376	0.66977	0.00220172	0.0183791	0.0388137	28.4704	41.709	0.175149	0.630038	0.583043	0.106827	1.49506
	x	Utö	N 59°47	E 21°23	2006-06-30	2006-10-02	4.75242	4.27537	3.82942	1.51701	2.12185	2.96191	0.69922	20.1572	11.917	1.14256	5.56599	18.6255	2.19733	0.10271	0.404168	0.727752	3.43196	0.22299	0.461547	0.00331663	0.177427	0.0919633	0.00220172	0.00593444	0.0334759	0.998856	43.1124	0.350213	1.16363	1.04671	0.141108	2.70166
	x	Virolahti	N 60°31	E 27°41	2006-07-01	2006-10-01	5.64114	4.25244	3.17918	1.71535	1.39615	1.82308	0.328901	18.3362	10.5253	0.524955	4.00989	15.0601	1.86008	0.176756	0.563814	1.0802	3.68085	0.911825	2.27366	0.0586625	0.780959	0.527127	0.00238721	0.0263723	0.0746173	4.65561	42.0208	0.201445	0.843032	0.624166	0.106781	1.77542
	x	Oulanka	N 66°19	E 29°24	2006-06-30	2006-09-30	1.40961	1.30482	1.02736	0.372886	0.372941	0.649594	0.121954	5.25916	7.83953	0.0632495	2.23375	10.1365	0.795154	0.0299019	0.135116	0.0955265	1.0557	0.218969	0.445284	0.00568614	0.100502	0.0502925	0.00220172	0.00222936	0.00938779	0.834553	54.8005	0.184351	0.594314	0.530356	0.0736672	1.38269
	x	Hailuoto	N 65°00	E 24°41	2006-07-04	2006-10-03	1.51077	1.57382	1.58013	1.49188	1.68176	2.63013	0.613886	11.0824	7.69664	0.195585	2.49693	10.3892	0.795154	0.066086	0.318114	0.272411	1.45177	0.82561	2.22862	0.170781	0.667296	0.476477	0.010513	0.0466526	0.113775	4.53972	40.7924	0.175091	0.569788	0.631099	0.102747	1.47873
France	x	Donon	N 48°30	E 07°08	2006-07-05	2006-10-05	4.35021	5.80117	6.14626	1.91603	2.72932	4.38554	1.15717	26.4857	13.8162	0.491863	11.2479	25.5559	6.36194	0.162127	3.68879	4.98323	15.1961	0.700269	1.54032	0.0147493	0.383792	0.174313	0.00220172	0.00558678	0.0321331	2.85336	31.2779	1.23992	1.33275	1.05563	0.023674	3.65197
	x	Peyrusse Vieille	N 47°37	E 00°11	2006-07-11	2006-10-10	1.46121	2.59298	2.58355	1.02281	1.34718	2.05453	0.566822	11.6291	20.1918	1.96672	95.1172	117.276	9.28659	0.106642	1.3353	2.48403	13.2126	1.08659	0.730701	0.00970574	0.157943	0.0994112	0.00220172	0.00222936	0.0188457	2.10762	26.3545	1.04617	1.13034	1.72377	0.150115	4.05039
	x	La Tardiere	N 46°39	W 00°45	2006-07-04	2006-10-03	2.61353	4.59087	4.69439	1.77891	2.14886	3.40648	0.835856	20.0689	28.4773	6.29722	169.793	204.568	11.009	0.179927	2.01119	3.53114	16.7313	0.924882	0.93807	0.011678	0.193072	0.117258	0.00220172	0.00222936	0.0208965	2.21029	35.1909	1.06402	1.48906	1.72963	0.234046	4.51676
	x	Le Casset	N 45°00	E 06°28	2006-07-04	2006-10-03	2.66539	4.11747	3.79461	1.12641	1.49557	2.44097	0.557245	16.1977	26.2311	1.01223	49.574	76.8173	3.06052	0.0707923	1.73172	1.3622	6.22523	0.608236	0.552316	0.00331663	0.121734	0.063897	0.00220172	0.00222936	0.00889934	1.36283	43.4019	0.550786	1.2538	1.48452	0.15035	3.43946
	x	Porspoder	N 48°31	E 04°45	2006-07-10	2006-10-16	2.10409	4.19428	4.46687	1.82907	2.28352	3.65423	0.8135	19.3456	39.4652	3.96834	101.499	144.932	2.54702	0.156135	1.51822	2.02349	6.24486	2.16119	1.2512	0.048151	0.29497	0.186926	0.00220172	0.0155501	0.0470064	4.0072	36.3422	2.47352	2.65425	0.318726	0.280215	5.72671
Germany	x	Westerland	N 54°56	E 08°19	2006-07-07	2006-10-09	4.84987	6.70124	8.58862	2.47756	5.40263	8.50977	2.2549	38.7846	32.7885	2.42284	52.5687	87.7801	17.157	0.891479	3.2171	5.73371	26.9993	1.67384	4.12241	0.0620767	2.23708	0.794008	0.00766762	0.0199296	0.0822828	8.99929	46.0157	0.0333643	0.0521468	0.0463659	0.023674	0.155551
	x	Schmücke	N 50°39	E 10°46	2006-07-10	2006-10-10	7.19065	9.02051	8.46843	2.1684	3.58944	6.10242	1.44037	37.9802	34.3287	1.40982	63.2068	98.9453	16.9657	0.480525	6.0815	9.16064	32.6884	1.39857	2.3614	0.0682974	0.441265	0.22408	0.00581578	0.0117402	0.029171	4.54034	88.1583	0.75927	1.45278	1.66305	0.220728	4.09583
	x	Zingst	N54°26	E 12°44	2006-07-10	2006-10-09	4.7729	5.01189	4.29295	1.32212	2.26023	3.44987	0.945377	22.0553	25.8116	1.38829	36.9117	64.1115	36.5952	1.66757	15.3201	30.4896	84.0725	1.25758	1.82665	0.0278002	0.400265	0.178365	0.00658345	0.0100053	0.03748	3.74473	57.4273	0.373261	0.940324	0.938323	0.100445	2.35235
	x	Schauinsland	N 47°54	E 07°54	2006-07-10	2006-10-10	6.92638	11.9366	12.2952	3.41796	5.29739	8.27515	2.04273	50.1915	36.2795	2.7229	159.344	198.347	7.84651	0.142529	1.78907	3.03041	12.8085	0.963123	2.69513	0.0633854	0.567946	0.214582	0.00220172	0.00703774	0.0256217	4.53902	64.2244	1.10868	2.14798	2.53035	0.282329	6.06935
	x	Neuglobsow	N 53°09	E 13°02	2006-07-24	2006-10-24	5.22851	4.39569	3.60499	1.52686	1.72575	2.87584	0.551921	19.9096	26.862	1.1407	42.2176	70.2203	49.0425	0.945667	15.6272	25.5269	91.1422	1.53205	1.66583	0.0223175	0.330832	0.137669	0.00795084	0.00803917	0.0266083	3.7313	47.4779	0.424499	0.927041	0.922544	0.0920862	2.36617
Greece	x	Aliartos	N 38°22	E 23°05	2006-07-11	2006-10-12	5.1967	3.30482	1.87497	0.719609	0.859856	1.26454	0.409816	13.6303	29.3763	5.16439	24.574	59.1147	151.488	1.17744	30.6392	45.5778	228.882	7.29123	11.4391	0.313288	3.5171	1.49865	0.00883462	0.0488553	0.136246	24.2533	36.3301	4.7238	3.36525	2.15496	0.17793	10.4219
Greenland	-	Nuuk	N 64°11	W 51°44	2006-07-04	2006-10-08	5.96314	6.79861	2.46682	0.678728	0.557444	0.872559	0.22902	17.5663	9.76014	0.0632495	2.10524	11.9286	0.795154	0.0299019	0.135116	0.0955265	1.0557	0.909704	2.76434	0.179295	0.616141	0.580963	0.00714627	0.0215205	0.0440832	5.12319	49.6944	0.35541	0.646036	0.673122	0.114256	1.78882
	-	Summit	N 72°52	W 38°46	2006-07-28	2006-10-20	0.626642	0.747462	0.439251	0.0757245	0.0918497	0.161555	0.0270545	2.16954	12.8069	0.0632495	1.76898	14.6391	0.795154	0.0299019	0.135116	0.0955265	1.0557	0.0586938	0.0690561	0.00331663	0.0150149	0.00789635	0.00220172	0.00222936	0.00220972	0.160619	109.855	0.211967	1.36453	1.1809	0.280711	3.0381
Hungary	x	K-puszta	N 46°58	E 19°35	2006-07-18	2006-10-19	9.54578	5.73917	3.5928	1.99078	2.89602	5.08622	1.52464	30.3754	95.3397	16.2031	80.1893	191.732	105.351	0.797083	12.4055	12.4631	131.016	2.31535	3.09122	0.0490292	0.807194	0.423771	0.0137236	0.0265308	0.102788	6.82961	51.5973	0.43666	0.935271	1.02748	0.13951	2.53892
Iceland	x	Stórhöfdi	N 63°27	W 20°15	2006-07-11	2006-10-08	0.962348	1.31517	0.865698	0.263619	0.365152	0.60963	0.143362	4.52498	12.742	0.0632495	2.82156	15.6268	0.795154	0.0299019	0.135116	0.0955265	1.0557	0.0586938	0.0690561	0.00331663	0.0258765	0.0222266	0.00220172	0.00222936	0.00220972	0.185811	43.3768	0.45257	1.67142	1.50255	0.23233	3.85887
Ireland	x	Mace Head	N 53°20	W 09°54	2006-07-10	2006-10-18	1.15278	1.4376	0.99304	0.261675	0.371753	0.644488	0.120433	4.98177	25.8639	0.266947	13.6772	39.808	0.795154	0.0985988	0.437094	0.33505	1.6659	2.91177	2.30543	0.0266141	0.364737	0.182525	0.00220172	0.0104139	0.0327949	5.83648	37.1322	0.678931	1.99497	1.81679	0.293938	4.78462
	-	Malin Head	N 55°22	W 07°20	2006-07-06	2006-10-08	1.21809	1.36146	0.985147	0.291033	0.373198	0.613225	0.128203	4.97036	23.0029	0.271666	14.7329	38.0074	0.795154	0.110288	0.396077	0.448341	1.74986	2.16178	7.06003	0.42764	2.28775	1.45363	0.013835	0.196574	0.250816	13.8521	33.5479	0.514364	1.58595	1.52014	0.219985	3.84044
	-	Carnsore Point	N 52°11	W 06°22	2006-07-19	2006-10-11	1.59117	1.6576	1.33425	0.518178	0.758931	1.2272	0.240702	7.32803	21.1924	0.253557	11.9912	33.4371	2.08692	0.167017	0.637473	0.409993	3.3014	0.377762	0.877163	0.00516844	0.238294	0.0986249	0.00220172	0.00515509	0.0243383	1.62871	27.7745	0.498127	1.51944	1.62631	0.187158	3.83104
Italy	x	Ispra	N 45°48	E 08°38	2006-09-07	2006-12-04	9.4856	16.6302	13.1436	6.04339	4.43391	6.1551	1.6579	57.5497	13.8848	0.468101	21.4494	35.8023	5.59706	0.199102	2.08461	2.25689	10.1377	5.15842	5.50751	0.356067	0.892279	0.634529	0.0198157	0.0465382	0.0903837	12.7055	51.1812	0.567261	0.610954	0.702938	0.0554842	1.93664
	x	Montelibretti	N 42°06	E 12°38	2006-07-03	2006-09-20	5.33517	8.75271	8.20387	2.72664	3.3983	5.47953	1.27394	35.1702	32.7277	2.42288	96.318	131.469	5.62312	0.155021	1.88335	2.06254	9.72404	1.17396	0.879592	0.00331663	0.197679	0.0731678	0.00220172	0.00222936	0.0140467	2.3462	61.5075	1.26139	1.84676	2.52018	0.270024	5.89835
	-	Longobucco	N 39°39	E 16°61	2006-07-28	2006-11-07	1.58122	1.68285	1.38209	0.398137	0.596274	1.01104	0.291883	6.94349	17.9164	0.41123	13.6127	31.9403	4.68053	0.0846952	1.82497	1.76636	8.35655	0.301878	0.532497	0.0221652	0.152268	0.113516	0.00220172	0.00656035	0.0156555	1.14674	40.7909	0.405028	0.982532	0.794505	0.105182	2.28725
	-	San Lucido	N 39°19	E 16°02	2006-07-27	2006-11-13	2.7249	2.76219	2.22437	0.767303	1.14368	1.75104	0.570586	11.9441	17.0845	0.738872	16.8207	34.644	9.64057	0.296529	4.90191	6.20322	21.0422	1.07072	2.6843	0.0563855	1.1184	0.669063	0.00220172	0.0312187	0.117293	5.74958	44.2521	0.429333	1.07425	0.839351	0.117749	2.46068
Kazakhstan	-	Borovoye	N 44°08	E 75°51	2006-08-15	2006-11-17	8.78835	6.58921	3.55158	1.82154	1.11231	1.32326	0.171333	23.3576	101.108	5.06969	19.5033	125.681	9.88296	0.263929	2.74842	2.05039	14.9457	3.31836	5.21067	0.0843992	1.65564	0.914355	0.0123433	0.0455102	0.168971	11.4102	115.493	0.392675	1.39881	1.44468	0.114985	3.35115
Latvia	x	Rucava	N 56°13	E 21°13	2006-07-17	2006-10-17	4.24911	3.39549	2.34525	1.16379	0.872225	1.19375	0.207172	13.4268	38.4905	2.56814	23.7251	64.7838	22.4538	0.899757	7.10854	8.0042	38.4663	2.36839	4.02422	0.205845	1.42733	1.00769	0.0122829	0.0819874	0.188665	9.31642	54.8115	0.0333643	1.36372	1.34411	0.023674	2.76486
	x	Zoseni	N 57°08	E 25°55	2006-07-17	2006-10-17	4.45792	4.48885	3.94035	1.68549	2.14983	3.59467	0.945309	21.2624	30.1073	1.24193	13.2525	44.6017	6.63212	0.233698	2.40189	2.92578	12.1935	0.897406	2.12547	0.0975263	0.596968	0.411075	0.00498363	0.0238859	0.0649591	4.22227	52.91	0.203706	0.76889	0.730591	0.108506	1.81169
Lithuania	x	Preila	N 55°21	E 21°04	2006-07-22	2006-10-01	6.50693	6.47683	5.59058	2.87903	2.62994	3.47837	0.592883	28.1546	37.8902	3.75711	22.3052	63.9526	20.4824	1.07621	7.72165	6.59938	35.8796	0.979592	1.43107	0.00835214	0.458926	0.22191	0.00689123	0.0104629	0.0553625	3.17256	50.7237	0.401097	1.40366	1.26325	0.198342	3.26634
	-	Rugsteliskis	N 55°26	E 26°04	2006-07-15	2006-09-30	6.26387	4.64741	3.11518	1.5457	1.11719	1.52678	0.329668	18.5458	45.0249	1.92963	19.4689	66.4234	10.5235	1.86722	4.89725	4.25548	21.5434	1.44501	5.09954	0.318555	1.43749	1.03412	0.0101362	0.0612425	0.123964	9.53007	60.5492	0.27041	0.892298	0.858073	0.117421	2.1382
Malta	x	Giordan lighthouse	N 36°06	E 14°12	2006-08-02	2006-11-07	5.35247	4.39707	3.0025	1.00473	1.77531	2.60952	0.913306	19.0549	23.9059	7.19563	30.6971	61.7987	10.0731	0.602211	4.15718	7.06009	21.8926	0.496851	1.28591	0.023739	0.371018	0.321626	0.00220172	0.0174852	0.140179	2.65901	33.6433	1.93619	0.751228	1.86915	0.262582	4.81916
Moldova	x	Leovo	N 46°30	E 28°16	2006-07-10	2006-10-10	16.6239	8.9384	4.67203	2.8361	2.19832	2.82186	0.671179	38.7618	155.488	33.8144	106.296	295.598	280.827	1.89178	38.601	34.3663	355.686	2.77818	4.20066	0.0497545	1.68768	0.858212	0.0227403	0.047156	0.278234	9.92261	46.7873	1.28979	0.821176	1.14711	0.128983	3.38706
Netherlands	x	Kollumerwaard	N 53°20	E 06°17	2006-07-26	2006-11-22	7.5009	9.79536	9.69298	3.07342	5.51752	8.86186	1.83272	46.2748	33.5079	1.14959	56.9743	91.6318	21.7202	1.40206	6.60186	6.39803	36.1221	2.63553	4.28011	0.0286807	1.41737	0.593333	0.0128708	0.016727	0.0700814	9.0547	59.0492	3.33335	2.03923	3.84814	0.360911	9.58163
	x	Vredepeel	N 51°32	E 05°51	2006-07-25	2006-11-21	17.3197	20.278	15.695	4.66507	6.91299	10.1324	2.64696	77.6501	31.2467	1.90778	127.544	160.699	20.3174	0.547082	8.20915	9.26709	38.3407	5.42577	11.0831	0.10904	3.277	1.41414	0.0183957	0.0448562	0.156548	21.5288	72.4388	7.31488	4.54813	6.96987	0.542763	19.3756
Norway	x	Birkenes	N 58°23	E 08°15	2006-07-02	2006-10-01	2.03516	2.16253	1.70439	0.451453	0.672034	1.0837	0.23988	8.34915	9.56686	0.189276	6.81524	16.5714	0.795154	0.0299019	0.695815	0.92248	2.44335	0.618831	0.699245	0.00739668	0.139897	0.0632431	0.00220172	0.00222936	0.0148038	1.54785	45.981	0.419058	0.863724	0.933382	0.0763341	2.2925
	x	Tustervatn	N 65°50	E 13°55	2006-06-28	2006-10-09	0.722454	0.93158	0.524363	0.0757245	0.0918497	0.161555	0.0700888	2.57762	6.45486	0.0632495	2.11171	8.62981	0.795154	0.0299019	0.135116	0.0955265	1.0557	3.76361	4.21601	0.0464966	0.572072	0.14855	0.00220172	0.00222936	0.00773509	8.7589	35.5535	0.334864	0.756587	0.586424	0.0867532	1.76463
	x	Kårvatn	N 62°47	E 08°53	2006-06-29	2006-10-10	0.774021	0.838407	0.58492	0.0757245	0.200328	0.161555	0.0780139	2.71297	5.74965	0.0632495	3.28639	9.09929	0.795154	0.0299019	0.135116	0.0955265	1.0557	2.3	2.33884	0.0605846	0.391691	0.137221	0.00220172	0.00222936	0.010045	5.24281	33.7053	0.143194	0.484898	0.498261	0.023674	1.15003
	x	Spitsbergen	N 78°54	E 11°53	2006-07-14	2006-09-26	1.47819	1.17145	0.620613	0.0757245	0.0918497	0.161555	0.073372	3.67275	15.4269	0.0632495	1.79233	17.2825	0.795154	0.0299019	0.135116	0.0955265	1.0557	0.137745	0.0690561	0.00685991	0.0150149	0.0173734	0.00220172	0.00222936	0.00220972	0.25269	100.178	0.160428	1.46959	1.82004	0.408074	3.85814
	x	Hurdal	N 60°22	E 11°04	2006-07-01	2006-10-02	2.24226	2.56895	2.09177	0.649143	1.20391	1.7725	0.611801	11.1403	7.6932	0.0632495	4.8501	12.6065	0.795154	0.0299019	0.431753	0.381896	1.6387	0.799372	1.27743	0.0146479	0.180247	0.0720684	0.00220172	0.00222936	0.0108284	2.35903	42.2699	0.357245	0.817753	1.60936	0.252615	3.03697
	x	Karasjok	N 69°28	E 25°13	2006-06-26	2006-09-29	1.53651	1.65258	0.965076	0.344529	0.312043	0.471732	0.090478	5.37294	9.03659	0.0632495	2.34849	11.4483	0.795154	0.0299019	0.135116	0.0955265	1.0557	0.296999	0.683479	0.0104464	0.134684	0.0705902	0.00220172	0.00222936	0.0106946	1.21132	47.5108	0.61074	1.12257	1.52069	0.172715	3.42671
Poland	x	Diabla Gora	N 54°09	E 22°04	2006-07-06	2006-10-06	3.59685	2.27244	1.29852	0.505933	0.603831	0.887338	0.279068	9.44398	30.3515	1.43635	18.9299	50.7178	22.0527	0.498759	6.14687	7.40252	36.1009	1.04415	2.22967	0.0442752	0.709502	0.399725	0.0124094	0.0305683	0.0854847	4.55579	24.4106	0.221872	0.852552	0.835413	0.131796	2.04163
	x	Jarczew	N 51°19	E 21°59	2006-07-01	2006-10-02	6.8476	4.53039	2.84068	0.940198	1.18866	1.95612	0.476741	18.7804	38.8133	1.57484	33.9335	74.3217	120.343	1.4429	23.3668	39.9049	185.058	2.96475	5.81601	0.0937015	1.9955	1.07606	0.0308799	0.0636449	0.192529	12.2331	49.858	0.339387	1.06962	1.06373	0.140772	2.61351
	x	Sniezka	N 50°44	E 15°44	2006-07-10	2006-10-10	1.79637	1.4826	0.606629	0.217265	0.0918497	0.161555	0.0270545	4.38332	4.66202	0.240758	18.5566	23.4594	3.2578	0.133859	1.9522	1.20465	6.54851	3.08592	2.25741	0.0800773	0.14558	0.0712912	0.00870978	0.00754528	0.00998952	5.66652	26.2104	0.0333643	0.0521468	0.0463659	0.023674	0.155551
	x	Leba	N 54°45	E 17°32	2006-07-13	2006-10-13	4.96155	4.98836	4.01429	1.27581	1.95702	3.01608	0.760902	20.974	35.3143	2.47794	36.6858	74.478	46.7197	1.53482	16.4281	27.5284	92.2111	3.88645	8.32291	0.430818	3.25352	1.84656	0.0455719	0.152771	0.281799	18.2204	47.1894	0.529808	1.44408	1.40257	0.20188	3.57834
Portugal	x	Bragança	N 41°49	W 06°46	2006-07-19	2006-10-19	1.04047	1.25486	1.54083	0.472898	0.812827	1.34644	0.406641	6.87498	12.8286	0.310281	77.7103	90.8492	2.55452	0.0739309	0.997394	1.42197	5.04781	0.837047	1.50674	0.0718884	0.423043	0.343767	0.00220172	0.0169199	0.0503035	3.25191	30.879	0.305623	0.782546	0.723253	0.104722	1.91614
	x	Monte Velho	N 38°05	W 08°48	2006-07-19	2006-10-19	1.63888	1.71903	1.77291	0.531783	0.922908	1.48965	0.453595	8.52875	10.297	0.193784	88.9594	99.4503	2.38806	0.098905	0.694454	0.985786	4.1672	0.723788	1.99948	0.0257013	0.498725	0.195335	0.00220172	0.00941326	0.0306775	3.48532	29.5119	0.580378	1.48723	2.55094	0.023674	4.64222
Slovakia	x	Chopok	N 48°56	E 19°35	2006-07-02	2006-10-03	7.05	4.68742	7.61542	1.88089	5.64781	9.46167	2.55819	38.9014	61.9397	2.65693	30.7658	95.3625	25.3608	0.413145	5.39206	7.1459	38.3119	0.309864	0.676494	0.00622946	0.301063	0.111673	0.00405751	0.00755596	0.0340533	1.45099	31.6399	0.343913	1.11776	0.981762	0.156069	2.5995
	x	Starina	N 49°03	E 22°16	2006-07-04	2006-10-04	20.3969	5.72781	2.19806	0.717171	0.941016	1.54811	0.420195	31.9493	39.976	1.68487	27.1428	68.8036	26.9516	0.602905	5.13688	5.34478	38.0362	0.746262	1.13954	0.0167558	0.339579	0.188636	0.00721726	0.0114824	0.0341614	2.48363	37.4641	0.192761	0.607904	0.526925	0.0702903	1.39788
Slovenia	x	Iskrba	N 45°34	E 14°52	2006-07-07	2006-10-06	4.75996	3.65157	2.35038	0.718211	0.908168	1.4354	0.317923	14.1416	22.2043	0.67495	23.8975	46.7767	9.97746	0.14005	1.74851	2.26838	14.1344	0.427729	0.692692	0.0159809	0.135854	0.0704363	0.012474	0.00883251	0.023797	1.3878	41.7119	0.236899	0.589773	0.627424	0.0759668	1.53006
Spain	x	Víznar	N 37°14	W 03°32	2006-07-14	2006-10-14	2.27557	2.12632	2.17286	0.61578	1.40594	2.48569	1.20051	12.2827	19.9203	1.60538	46.2494	67.7751	15.7834	0.18689	2.52689	2.81293	21.3101	0.653951	1.141	0.0149702	0.328209	0.178202	0.00220172	0.00614115	0.0324082	2.35708	29.9192	0.905251	1.18459	1.22717	0.13816	3.45517
	x	Niembro	N 43°27	W 04°51	2006-07-12	2006-10-12	2.57628	2.70791	2.3279	0.691664	1.10561	1.95284	0.588977	11.9512	14.5348	0.482311	38.51	53.5272	0.795154	0.0756792	0.667796	0.793638	2.33227	0.843041	1.88868	0.0169132	1.31691	0.579301	0.00220172	0.0259025	0.292284	4.96524	28.1721	0.423553	1.23411	1.02893	0.157938	2.84452
	x	Els Torms	N 41°24	E 00°43	2006-07-15	2006-10-15	2.67061	2.56758	2.3971	0.717267	1.17647	2.0354	0.672884	12.2373	21.0887	1.13947	47.8977	70.1259	7.84913	0.491735	2.38344	2.99898	13.7233	0.491862	0.532416	0.00799278	0.135481	0.0843273	0.00220172	0.00222936	0.0148744	1.27138	38.676	0.754588	1.35156	1.3273	0.188709	3.62215
	x	Risco Llamo	N 39°31	W 04°21	2006-07-13	2006-10-13	2.09041	2.13491	2.06427	0.618501	1.12133	1.91296	0.737613	10.68	43.8739	3.72762	56.7556	104.357	20.3752	0.116218	2.14678	4.86386	27.502	9.74198	20.2456	0.914481	1.25461	2.44266	0.00721694	0.0809601	0.241637	34.9291	53.7667	1.11714	2.48087	2.12567	0.313362	6.03704
Sweden	x	Råö	N 57°24	E 11°55	2006-07-04	2006-10-02	4.68304	5.70199	6.50819	1.8811	4.65101	6.83359	2.12638	32.3853	10.9115	0.682384	11.583	23.1769	5.22006	0.225109	2.30651	1.97733	9.72901	0.638794	0.802964	0.00331663	0.211579	0.0881107	0.00220172	0.00222936	0.0250803	1.77428	38.3732	0.541049	1.31536	1.30834	0.16426	3.329
	x	Aspvreten	N 58°48	E 17°23	2006-07-06	2006-10-06	3.34027	3.03865	2.38513	0.689181	1.03306	1.61346	0.381271	12.481	12.7146	0.488515	6.1744	19.3775	2.05097	0.0705943	0.772734	0.746961	3.64126	0.603692	1.29174	0.0061224	0.203746	0.0814475	0.0131089	0.00222936	0.0183791	2.22046	58.7115	0.257199	0.6202	0.801848	0.0648794	1.74413
	x	Vavihill	N 56°01	E 13°09	2006-07-11	2006-10-08	4.02876	4.5257	4.85954	1.29616	2.75425	4.23061	1.32071	23.0157	12.2118	0.675201	11.4773	24.3644	8.04307	0.181722	2.16533	3.0243	13.4144	1.81307	4.9771	0.0373677	1.0574	0.456585	0.0558202	0.0445736	0.0989767	8.54088	57.3068	0.391177	0.868711	1.05894	0.023674	2.3425
	x	Bredkälen	N 63°51	E 15°20	2006-06-06	2006-09-06	2.3046	1.30395	0.921554	0.25551	0.349943	0.57885	0.125067	5.83947	7.95421	0.0632495	2.95542	10.9729	0.795154	0.0299019	0.135116	0.0955265	1.0557	0.812041	2.41075	0.0478236	0.416105	0.17254	0.00220172	0.00222936	0.0119171	3.87561	42.1136	0.0333643	0.605692	0.589407	0.023674	1.25214
	x	Hoburg	N 56°55	E 18°09	2006-06-30	2006-10-03	4.10818	4.35105	4.04684	1.6205	2.26627	3.37192	0.763442	20.5282	11.6353	1.08219	8.90868	21.6262	3.9983	0.130104	1.24754	1.8006	7.17654	0.555288	1.66014	0.0165802	0.419944	0.147689	0.00220172	0.00222936	0.0298125	2.83389	48.3332	0.535463	1.3041	1.22257	0.297782	3.35992
	-	Abisko	N 68°21	E 18°49	2006-07-06	2006-10-11	0.961313	4.26346	8.74612	3.27052	4.66839	6.2035	1.33334	29.4466	6.84203	0.0632495	5.55632	12.4616	0.795154	0.0299019	0.135116	0.0955265	1.0557	1.51638	2.1421	0.0253375	0.319915	0.119717	0.00220172	0.00222936	0.00946779	4.13735	39.4502	0.119605	0.436989	0.445307	0.0571538	1.05905
	x	Vindeln	N 64°15	E 19°46	2006-06-28	2006-09-28	1.3351	1.44814	1.32871	0.488806	0.683415	1.11329	0.220364	6.61784	9.00508	0.221166	3.91024	13.1365	0.795154	0.0299019	0.321211	0.262538	1.40881	0.287749	0.518039	0.00689322	0.117745	0.0506129	0.00220172	0.00222936	0.00896247	0.994432	38.4535	0.22644	0.796424	0.768624	0.116254	1.90774
Switzerland	x	Jungfraujoch	N 46°33	E 07°59	2006-07-06	2006-10-13	2.66707	7.11649	5.12424	1.54965	2.19617	3.03283	1.52104	23.2075	22.9825	0.321758	15.8539	39.1581	1.82068	0.0711771	1.05443	1.20904	4.15533	0.393454	0.951101	0.189088	0.0349849	0.0173578	0.00220172	0.00222936	0.00220972	1.59263	60.7411	0.498491	1.29874	1.4051	0.199436	3.40176
	x	Payerne	N 46°48	E 06°57	2006-07-05	2006-10-11	4.97723	13.0357	11.1796	3.53413	3.50955	5.24414	1.0505	42.5309	18.9427	1.05216	47.0595	67.0543	9.5604	0.301731	3.00595	6.66897	19.5371	1.79036	3.83094	0.0455081	0.814996	0.362664	0.00220172	0.0108815	0.0408114	6.89837	59.1944	0.729575	1.20271	1.4583	0.13341	3.524
Ukraine	-	Zmeiny Island	N 45°15	E 30°12	2006-07-17	2006-11-08	18.1013	14.4366	9.59189	6.83288	4.99825	5.96312	1.20424	61.1282	123.004	49.3609	138.395	310.76	257.12	10.1354	26.2348	30.1392	323.629	5.81089	5.28991	0.0182497	1.53174	0.531114	0.0237656	0.0269931	0.1888	13.4215	76.8169	1.68695	1.60942	1.99189	0.185763	5.47402
United Kingdom	x	Harwell	N 51°34	W 01°19	2006-07-05	2006-10-09	6.3729	8.02096	6.10477	2.32704	2.24696	3.4116	0.853728	29.3379	17.1075	0.499416	59.2298	76.8367	11.3371	0.217586	1.15354	1.77532	14.4836	1.5094	4.46021	0.0220747	0.922979	0.378504	0.0330397	0.0356166	0.0856274	7.44745	41.7067	0.712046	1.38373	1.53514	0.173321	3.80424
	-	Auchencorth Moss	N 55°80	W 03°20	2006-07-03	2006-10-13	4.64634	3.11996	1.51051	0.422693	0.475932	0.87223	0.209757	11.2574	21.229	0.271949	93.741	115.242	2.29357	0.207616	0.619022	0.932556	4.05277	1.17043	1.83976	0.0251852	0.307995	0.118143	0.00524472	0.00953864	0.0263017	3.50259	40.5074	0.962942	1.16287	1.19694	0.158571	3.48132
	x	Lough Navar	N 54°26	W 07°54	2006-07-03	2006-10-11	1.32271	1.4837	0.995545	0.268763	0.337208	0.560286	0.127407	5.09562	22.8491	0.196583	16.6879	39.7336	0.795154	0.0299019	0.339775	0.352285	1.51712	1.71292	2.26211	0.0115561	0.401535	0.177639	0.00220172	0.00714108	0.0313831	4.60649	43.1615	0.421251	1.31956	1.35267	0.161142	3.25463
	x	Yarner Wood	N 50°36	W 03°43	2006-06-30	2006-10-02	2.01542	2.71354	2.33277	0.736413	0.922595	1.51092	0.325522	10.5572	16.7082	0.591324	37.854	55.1535	2.72817	0.105782	0.904795	1.08565	4.8244	0.722924	1.13248	0.0171937	0.273442	0.132956	0.00220172	0.00883612	0.0306916	2.32073	32.6499	0.562993	1.19492	1.06204	0.117556	2.9375
	x	High Muffles	N 54°20	W 00°48	2006-07-05	2006-10-04	3.45351	3.65724	2.48474	0.719169	0.879753	1.33566	0.306299	12.8364	23.2064	0.403181	70.7335	94.343	7.51924	0.218647	1.37827	1.68008	10.7962	2.4447	3.17611	0.0257229	0.748984	0.303788	0.00220172	0.0168723	0.0579673	6.77635	50.6873	0.657581	1.37117	1.5162	0.22537	3.77032
	x	Strath Vaich Dam	N 57°44	W 04°46	2006-06-30	2006-10-02	0.958792	1.15869	0.875577	0.219128	0.301229	0.507104	0.115581	4.1361	21.0176	0.189246	13.0829	34.2897	0.795154	0.0299019	0.528906	0.392472	1.74643	0.29164	0.380896	0.00331663	0.109021	0.0367281	0.00220172	0.00222936	0.00602971	0.832062	41.7343	0.390153	1.3604	1.3135	0.165645	3.22971
		Average					4.63844	4.84161	4.23883	1.46351	2.04603	3.15017	0.80184	21.1804	26.3186	2.38084	35.3992	64.0986	21.1176	0.474606	4.29206	5.65761	31.5419	1.67654	2.82387	0.0718359	0.718459	0.386804	0.00771885	0.0215967	0.0668672	5.77368	48.6012	0.76202	1.23626	1.34392	0.157018	3.49921
		Std.dev.					3.99316	4.13052	4.62179	1.49423	2.41481	3.68619	0.874687	18.9959	24.4567	6.56799	38.0715	59.0645	46.9976	1.1479	6.92124	9.34132	62.3598	1.78981	3.33121	0.130289	0.758618	0.444641	0.00977634	0.0314627	0.071594	6.13676	18.2976	1.10576	0.689757	0.951818	0.0985339	2.67039
		Median					3.81281	4.15588	2.53415	1.01377	1.19628	1.95448	0.568704	16.882	20.6047	0.68569	19.4861	45.6892	5.99253	0.161396	1.80702	2.03694	10.467	0.971357	1.90974	0.0255194	0.418025	0.191985	0.00220172	0.0102096	0.0341073	3.9414	45.1166	0.444615	1.18975	1.21128	0.145612	3.24427
		Bold: average of two PAS
		1/2 MDL
		Ion ratio: NO (possible interference)

## Sheet: Field and method blanks
	PCB-28	PCB-52	PCB-101	PCB-118	PCB-138	PCB-153	PCB-180	α-HCH	β-HCH	γ-HCH	p,p'-DDE	p,p'-DDD	o,p'-DDT	p,p'-DDT	Fluorene	Phenanthrene	Anthracene	Fluoranthene	Pyrene	Benzo[a]pyrene	Benz[a]anthracene	Chrysene	HCB	trans-Chlordane	cis-Chlordane	trans-Nonachlor	cis-Nonachlor
Field blank Aspvreten	0.122534	0.0852644	0.0542372	0.0013385	0.0183976	0.0309965	0.00176533	0.24953	0.0201661	0.184308	0.0828243	0.000444204	0.000903211	0.0183006	0.014702	0.0446762	0.00663327	0.00484862	0.00484532	0.00440344	0.00445872	0.00441944	0.658805	0.00513284	0.00835887	0.00950409	0.00492118
Field blank Birkenes	0.176376	0.17888	0.157815	0.0309641	0.0349288	0.0760174	0.00176533	0.420239	0.0241806	0.288936	0.158583	0.000888409	0.00135482	0.0304415	0.014702	0.0460723	0.00663327	0.00484862	0.00484532	0.00440344	0.00445872	0.00441944	1.32742	0.00886582	0.0139315	0.0126721	0.00715809
Field blank Košetice	0.154726	0.141764	0.0947996	0.0381027	0.0436388	0.0614571	0.0213605	0.525478	0.0358508	0.529344	0.393281	0.000888409	0.0940243	0.0419575	0.0705695	0.0335071	0.00663327	0.00484862	0.00484532	0.00440344	0.00445872	0.00441944	0.913567	0.0261308	0.0408656	0.0262494	0.0147636
Field blank Pallas	0.333935	0.278372	0.161695	0.0556818	0.0563482	0.0860221	0.0208309	0.819803	0.0218466	0.507872	0.154468	0.0116382	0.0400123	0.0331197	0.102914	0.120067	0.00663327	0.0261825	0.0174431	0.00440344	0.00445872	0.00441944	3.0638	0.0111989	0.0167177	0.0144824	0.00760547
Field blank Råö	0.0936288	0.0865016	0.0801084	0.0131173	0.0262188	0.0481473	0.001324	0.263744	0.0269815	0.223528	0.231568	0.000888409	0.00180642	0.00223178	0.014702	0.0237342	0.00663327	0.00484862	0.00484532	0.00440344	0.00445872	0.00441944	0.689994	0.00373298	0.00557258	0.00905151	0.00492118
Field blank Spitsbergen	0.173655	0.132794	0.0820488	0.00312318	0.0295073	0.0507378	0.00176533	0.458716	0.0264213	0.465053	0.0804988	0.000888409	0.00135482	0.00178543	0.0793907	0.0823717	0.00663327	0.0164853	0.00484532	0.00440344	0.00445872	0.00441944	2.15513	0.0261308	0.00928764	0.0619123	0.0306903
Feltblank Storhofdi	0.208568	0.198985	0.18461	0.0165082	0.0437277	0.0904884	0.0102389	0.415214	0.0233404	1.29165	0.151785	0.000444204	0.000903211	0.00133907	0.0735099	0.0767872	0.00663327	0.010667	0.00484532	0.00440344	0.00445872	0.00441944	0.777425	0.00886582	0.0139315	0.0230814	0.012974
Methodblank	0.121854	0.130629	0.227667	0.159282	0.194375	0.31863	0.0358362	0.301073	0.0197926	0.255177	0.36457	0.0671637	0.0373026	0.0285668	0.014702	0.00698066	0.00663327	0.00484862	0.00484532	0.00440344	0.00445872	0.00441944	0.677904	0.0125988	0.0306492	0.0108618	0.0107371
Methodblank	0.0903416	0.057221	0.0559004	0.0416721	0.0549262	0.11952	0.0381311	0.100214	0.0060685	0.11555	0.163323	0.0110163	0.00135482	0.0163367	0.014702	0.00698066	0.00663327	0.00484862	0.00484532	0.00440344	0.00445872	0.00441944	0.412805	0.010639	0.0146745	0.02109	0.0041159
Methodblank	0.0770794	0.0568085	0.0645857	0.0356934	0.0526154	0.0988852	0.0301871	0.241347	0.0137241	0.605301	0.281388	0.000888409	0.00135482	0.0669535	0.014702	0.0139613	0.00663327	0.00484862	0.00484532	0.00440344	0.00445872	0.00441944	0.512326	0.0139987	0.0232191	0.0158401	0.00939499
Methodblank	0.146564	0.113205	0.111986	0.0379243	0.0397282	0.063333	0.0138578	0.626553	0.0281018	0.455869	0.212427	0.0214106	0.0737924	0.0457962	0.014702	0.0698066	0.00663327	0.0193945	0.00969063	0.00440344	0.00445872	0.00441944	0.507946	0.00326635	0.00650134	0.0018103	0.00134214
Methodblank	0.295622	0.235482	0.308237	0.101012	0.12194	0.2469	0.0359244	0.835452	0.1547	0.857003	1.98286	0.0323381	0.310705	0.230677	0.014702	0.0418839	0.00663327	0.0193945	0.00969063	0.00440344	0.00445872	0.00441944	0.53563	0.00606609	0.0116095	0.044624	0.00134214
Methodblank	0.111538	0.108874	0.0996967	0.0252531	0.0221305	0.0408225	0.0104154	0.274368	0.0306226	0.641543	0.20876	0.000444204	0.0828245	0.0161581	0.014702	0.0153574	0.00663327	0.00484862	0.00484532	0.00440344	0.00445872	0.00441944	0.337463	0.0144653	0.0241479	0.0144824	0.00850023
Methodblank	0.108478	0.0914504	0.053036	0.019096	0.0178643	0.0296566	0.00935624	0.358502	0.0201661	0.276773	0.0728961	0.00133261	0.00180642	0.00223178	0.014702	0.00698066	0.00663327	0.00484862	0.00484532	0.00440344	0.00445872	0.00441944	0.383894	0.0272507	0.0111452	0.0480635	0.0044738
Methodblank	0.0973695	0.119906	0.151994	0.0159728	0.044172	0.0845035	0.001324	0.422967	0.0365043	0.386365	0.284071	0.00133261	0.0961017	0.00267814	0.014702	0.0767872	0.00663327	0.0155156	0.00484532	0.00440344	0.00445872	0.00441944	0.349202	0.00606609	0.00975202	0.00588348	0.00357904
Methodblank	0.0742456	0.0476326	0.0267952	0.0132066	0.000888774	0.0177761	0.00176533	0.211483	0.0163383	0.161844	0.057333	0.00133261	0.00225803	0.00223178	0.014702	0.020942	0.00663327	0.00484862	0.00484532	0.00440344	0.00445872	0.00441944	0.26545	0.0083992	0.0134671	0.00724121	0.00402642
Methodblank	0.0598499	0.0532	0.0461062	0.00624635	0.00311071	0.00357309	0.00353066	0.195403	0.0112034	0.405727	0.0739694	0.000444204	0.000903211	0.000892714	0.014702	0.0153574	0.00663327	0.00484862	0.00484532	0.00440344	0.00445872	0.00441944	0.230056	0.0760594	0.12399	0.0782956	0.0442907
Methodblank	0.0614368	0.0468078	0.0362197	0.0209699	0.00835447	0.0176868	0.001324	0.104665	0.00933615	0.112074	0.0919475	0.000888409	0.00135482	0.00178543	0.014702	0.0181497	0.00663327	0.00484862	0.00484532	0.00440344	0.00445872	0.00441944	0.167154	0.0219312	0.0348286	0.0565719	0.031764
Average	0.139322	0.12021	0.110974	0.0352869	0.0451596	0.0825085	0.0133724	0.379153	0.0291858	0.431329	0.280364	0.00859289	0.0416732	0.0301936	0.0295673	0.0400224	0.00663327	0.00921237	0.00608356	0.00440344	0.00445872	0.00441944	0.775887	0.0161555	0.022925	0.025651	0.0114778
Std.dev	0.0763077	0.0664996	0.0748425	0.0387207	0.0461799	0.0802007	0.0135789	0.21391	0.0324377	0.293993	0.436648	0.0170703	0.0761866	0.0536198	0.0292735	0.0326966	2.67752e-18	0.00693917	0.00323638	8.92508e-19	1.78502e-18	8.92508e-19	0.738777	0.0168577	0.0271229	0.0223603	0.0119567
MDL	0.368246	0.319709	0.335502	0.151449	0.183699	0.323111	0.054109	1.02088	0.126499	1.31331	1.59031	0.0598037	0.270233	0.191053	0.117388	0.138112	0.00663327	0.0300299	0.0157927	0.00440344	0.00445872	0.00441944	2.99222	0.0667286	0.104294	0.0927319	0.047348
Bold: 1/2 IDL
Italics: NO ione ratio (possible caused by an interference, induced by the low levels in field and method blanks)
